1 **Maternal *Plag1* deficiency delays zygotic genome activation and two-cell stage**  
2 **embryo development**

3 **Running title** *Plag1* controls genome activation

4 Elo Madisson<sup>1§</sup>, Anastasios Damdimopoulos<sup>2§</sup>, Shintaro Katayama<sup>1§</sup>, Kaarel Krjutskov<sup>3,4</sup>,  
5 Elisabet Einarsdottir<sup>1,4</sup>, Katariina Mamia<sup>5</sup>, Bert De Groef<sup>6</sup>, Outi Hovatta<sup>5</sup>, Juha Kere<sup>1,7,8\*</sup>,  
6 Pauliina Damdimopoulou<sup>1,5,9\*</sup>

7 <sup>1</sup> Department of Biosciences and Nutrition, Karolinska Institutet, Stockholm, Sweden

8 <sup>2</sup> Bioinformatics and Expression Analysis core facility, Department of Biosciences and  
9 Nutrition, Karolinska Institutet, Stockholm, Sweden.

10 <sup>3</sup> Competence Centre on Health Technologies, Tartu, Estonia.

11 <sup>4</sup> Molecular Neurology Research Program, University of Helsinki and Folkhälsan Institute of  
12 Genetics, Helsinki, Finland

13 <sup>5</sup> Department of Clinical Science, Intervention and Technology, Karolinska Institutet,  
14 Stockholm, Sweden

15 <sup>6</sup> Department of Physiology, Anatomy and Microbiology, La Trobe University, Bundoora,  
16 Victoria, Australia

17 <sup>7</sup> Research Programs Unit, Molecular Neurology, University of Helsinki, and Folkhälsan  
18 Institute of Genetics, Helsinki, Finland.

19 <sup>8</sup> School of Basic and Medical Biosciences, King's College London, Guy's Hospital, London,  
20 UK

21 <sup>9</sup> Swetox, Karolinska Institutet, Unit of Toxicological Sciences, Södertälje, Sweden

22 <sup>§</sup> Equal contribution

23 \*Corresponding authors: [pauliina.damdimopoulou@ki.se](mailto:pauliina.damdimopoulou@ki.se) and [juha.kere@ki.se](mailto:juha.kere@ki.se)

24 **Keywords:** pleomorphic adenoma gene 1; preimplantation embryo; cleavage-stage embryo;

25 zygotic genome activation

26

27 **Abbreviations**

28 2c, 4c, 8c 2-cell, 4-cell, 8-cell

29 BMA Best match average

30 DEG Differentially expressed gene

31 dpc Days post coitus

32 GO Gene ontology

33 HET Heterozygous

34 hpf Hours post fertilization

35 KO Knockout

36 *matPlag1KO* Maternal *Plag1* knockout

37 *PLAG1* Pleomorphic adenoma gene 1

38 RNA-seq RNA sequencing

39 SINE Short interspersed nuclear element

40 WT Wildtype

41 ZGA Zygotic genome activation

42

43

## 44 **Abstract**

45 Pleomorphic adenoma gene 1 (*PLAG1*) is a transcription factor that is involved in cancer and  
46 growth. We discovered a *de novo* DNA motif containing a PLAG1 binding site, located within  
47 the promoters of genes activated during zygotic genome activation (ZGA) in human embryos.  
48 This site frequently overlapped with Alu elements and was conserved in mouse B1 elements.  
49 We show that *Plag1* is essential for timely preimplantation embryo development. Mouse  
50 oocytes lacking maternally loaded *Plag1* gave rise to embryos that spent significantly longer  
51 time in 2-cell stage, displayed delayed regulation of 1,089 genes and in contrast to wildtype,  
52 expressed *Plag1* from the paternal allele. The PLAG1 motif was enriched in promoters of  
53 mouse delayed-activation genes that also showed a significant overlap with human ZGA  
54 genes. By ontology, these mouse and human genes were connected to ribosome biogenesis  
55 and protein synthesis. Our data suggests that *PLAG1/Plag1* affects ZGA through a  
56 conserved DNA motif within retrotransposons influencing ribosomes and protein synthesis, a  
57 mechanism that might also explain its roles in cancer and growth.

## 58 **Introduction**

59 Early preimplantation embryo development is dependent on a number of processes,  
60 including chromatin remodeling, maternal RNA degradation and zygotic genome activation  
61 (ZGA) (Jukam et al., 2017; Niakan et al., 2012). Transcription from the newly formed zygotic  
62 genome starts gradually and a major increase in transcriptional output, also known as the  
63 major ZGA, takes place during the zygote to 2-cell (2c) transition in mice and 4c to 8c  
64 transition in humans (Jukam et al., 2017; Niakan et al., 2012). Successful ZGA is a  
65 prerequisite for the formation of a totipotent embryo with the capacity to grow, develop to all  
66 embryonic and extra-embryonic tissues, and implant into the receptive uterine endometrium.  
67 Knowledge about gene expression programs during the first steps of embryonic development  
68 is essential for understanding totipotency, lineage differentiation, and infertility, as well as for  
69 regenerative medicine. This has prompted many laboratories, including ours, to map  
70 transcriptional programs during preimplantation development (De Iaco et al., 2017;  
71 Petropoulos et al., 2016; Tohonen et al., 2015; Vassena et al., 2011; Xue et al., 2013; Yan et  
72 al., 2013).

73 In a previous study, we used an RNA sequencing (RNA-seq) method based on the detection  
74 of the 5' ends of transcripts to study gene expression during the first three days of human  
75 preimplantation development. Our data revealed 129 upregulated transcription start sites (or  
76 transcript far 5'-ends, TFEs) during human major ZGA and *de novo* motif analyses of the  
77 associated promoters led to our discovery of PRD-like homeodomain transcription factors as  
78 regulators of ZGA in humans (Jouhilahti et al., 2016; Madisson et al., 2016; Tohonen et al.,  
79 2015). Several additional significant *de novo* motifs were discovered, and some of them  
80 harbored known transcription factor binding sites, including that of pleomorphic adenoma  
81 gene 1 (PLAG1).

82 *PLAG1* encodes a C2H2 zinc finger transcription factor that was first characterized in 1997  
83 through positional cloning in pleomorphic adenomas of the salivary gland (Kas et al., 1997).

84 It belongs to the same protein family as the imprinted tumor suppressor PLAG-like 1  
85 (*PLAGL1*) and the oncogene PLAG-like 2 (*PLAGL2*). *PLAG1* and *PLAGL2* have overlapping  
86 functions; they can bind to the same DNA elements, induce insulin-like growth factor (*IGF2*)  
87 expression, and stimulate mitogenic signaling and tumor growth in mice (Hensen et al.,  
88 2002). Ectopic expression of *PLAG1* and *PLAGL2* resulting from chromosomal translocation  
89 events can be found in malignant tumors (Juma et al., 2016). Associations with cancer have  
90 been the focus of most studies on *PLAG1* family transcription factors and consequently, less  
91 is known about their role in normal physiology. There are no reports on *PLAG* family genes in  
92 preimplantation embryo development or pluripotency.

93 *Plag1* knockout (KO) mice are growth restricted and subfertile; *Plag1KO* males have  
94 impaired spermatogenesis (Juma et al., 2017) and *Plag1KO* females give birth to small litters  
95 (Hensen et al., 2004). The poor breeding success of the *Plag1KO* mice combined with our  
96 discovery of PLAG1 binding sites in the promoters of human ZGA genes prompted us to  
97 study the reproductive phenotype of *Plag1KO* animals. Here, we describe the role of *Plag1* in  
98 the murine female reproductive tract and preimplantation embryos. Our results show that  
99 *Plag1* is dispensable in normal ovarian and uterine function but essential for ZGA.

## 100 **Results**

### 101 ***A de novo motif containing a PLAG1 binding site is enriched in the promoters of*** 102 ***human ZGA genes***

103 Analysis of the 129 promoters upregulated during major ZGA in human embryos revealed 13  
104 significant *de novo* DNA motifs (Tohonen et al., 2015), including a 31 bp element harboring a  
105 known PLAG1 binding site (MA0163.1 in JASPAR,  $p=0.0076$  by TomTom) (Fig. 1a). This  
106 PLAG1 *de novo* motif was found in 74 of the 129 promoters upregulated during ZGA  
107 ( $E=2.6 \times 10^{-646}$  by MEME; File S1) and similar sites were found in 93 altogether ( $p<0.0001$  by  
108 MAST; Fig. 1b & File S1). On average, each promoter contained 4.3 motifs and they were  
109 preferably located approximately 1,250 bp upstream of the transcription start site (Fig. 1b). In  
110 addition, the PLAG1 *de novo* motif frequently overlapped with Alu elements in a manner  
111 similar to the PRD-like homeodomain transcription factor motif we discovered in our previous  
112 study (Tohonen et al., 2015) (Fig. 1b, c & File S1). In fact, these two motifs are both located  
113 within a conserved region of Alu elements in close vicinity to an RNA polymerase III promoter  
114 element, A-box (Ludwig et al., 2005) (Fig. 1c). Alu elements are primate-specific  
115 retrotransposable short interspersed nuclear elements (SINE) that emerged from a  
116 duplication of the 7SL RNA gene (Ullu and Tschudi, 1984) and their evolutionary  
117 counterparts in rodents are the B1 elements (Labuda et al., 1991). Interestingly, the segment  
118 of Alu elements containing the PRD and PLAG1 *de novo* motifs was well conserved in rodent  
119 B1 elements and the putative PLAG1/Plag1 binding within the elements was nearly identical  
120 to the consensus PLAG1 binding motif (Voz et al., 2000) (Fig 1c). Human PLAG1 and mouse  
121 Plag1 proteins are 94% identical by sequence and their DNA binding domains are identical  
122 (Text S1). Collectively, these data suggested that PLAG1/Plag1 could be involved in mouse  
123 and human ZGA through binding to Alu and B1 elements. If true, disruption of PLAG1/Plag1  
124 could lead to reproductive failure.

### 125 ***Plag1 knockout affects growth and reproduction in mice***

126 To study the role of *Plag1* in fertility, we obtained *Plag1* knockout (KO) mice (Hensen et al.,  
127 2004). Pups from heterozygous intercrosses (HET×HET) were genotyped to study the effect  
128 of *Plag1* deficiency on embryonic lethality. Genotype ratios from 16 litters encompassing 164  
129 pups did not significantly deviate from the expected Mendelian distribution, although 43%  
130 fewer KO pups were born (n=27) than expected (n=47) (Fig. 2a). Weights recorded at  
131 weaning (3 weeks of age) confirmed growth retardation in KO animals: *Plag1*KO females  
132 were 40% smaller and *Plag1*KO males 41% smaller than WT pups (Fig 2b) (Hensen et al.,  
133 2004). Compared to HET intercrosses, breeding pairs with a *Plag1*KO female and a  
134 *Plag1*HET male produced significantly fewer pups per litter (Fig. 2c). When we reversed  
135 parental genotypes (*Plag1*KO males with *Plag1*HET females), litter size was not affected  
136 (Fig. 2c). Homozygous KO×KO intercrosses produced the smallest litters (Fig. 2c). The  
137 significant reduction in litter size of *Plag1*KO mothers was seen as early as 7.5–8.5 days post  
138 coitum (dpc), when fewer implantation marks were observed in the uterus compared to the  
139 *Plag1*HET and WT mothers (Fig. 2d, e).

140 The number of litters per month over a three-month continuous breeding period did not differ  
141 between HET×HET crosses and pairs consisting of a *Plag1*KO female and a *Plag1*HET male  
142 (Fig. 2f). When we reversed the parental genotypes and crossed *Plag1*KO males with  
143 *Plag1*HET females, two of the three pairs did not manage to maintain the approximate one-  
144 litter-per-month rate (Fig. 2f). When we intercrossed homozygous *Plag1*KO mice, litter  
145 frequency was significantly reduced compared to *Plag1*HET intercrosses: the three KO×KO  
146 breeding pairs produced only two litters during the entire three-month test period (Fig. 2f).

147 In summary, *Plag1*KO females produced small litters with normal frequency; *Plag1*KO males  
148 had normal litter size but irregular frequency, and KO×KO pairs produced very small and very  
149 infrequent litters.

150 ***Plag1* deficiency does not affect the ovaries or uterus**

151 To study whether the reduced litter size of *Plag1KO* females could depend on impaired  
152 ovarian function, we carried out superovulation experiments and dissected the ovaries for  
153 histological evaluation. Oocyte yield and ovarian weights did not differ between WT and  
154 *Plag1KO* females (Fig. 3a,b). The general histology of *Plag1KO* ovaries was similar to WT:  
155 the number of follicles in different stages and *corpora lutea* did not differ between the  
156 genotypes when normalized by cross section surface area (Fig. 3c,d). The *Plag1KO* uteri  
157 were significantly smaller than WT uteri, but all normal uterine structures were present (Fig.  
158 3e,f). When the weights were corrected for body weight the significance between genotypes  
159 was lost ( $p=0.07$  by Student's t-test). To investigate possible differences at the transcriptomic  
160 level, we performed RNA-seq from a piece of uterine horn, plus mucosa scraped from the  
161 endometrial surface, and from outer muscle layer myometrium (Fig. S1). Principal  
162 component analysis separated the samples by tissue type (uterus, mucosa, myometrium) but  
163 not by genotype (Fig. 3g). Taken together, these data show that *Plag1KO* and WT ovaries  
164 and uteri were not significantly different.

#### 165 ***Maternal Plag1 deficiency delays 2-cell stage embryo development***

166 We used embryos derived from *Plag1KO* females crossed with WT males to study the effect  
167 of maternal *Plag1* deficiency on embryonic development. These breeding pairs produced  
168 *Plag1HET* embryos that lack the maternal *Plag1* allele, and will hereafter be referred to as  
169 *matPlag1KO* embryos. We observed preimplantation development of WT and *matPlag1KO*  
170 embryos by time-lapse microscopy from zygote up to late morula or early blastocyst stages  
171 (Movie 1 and 2). We recorded the time each embryo spent in different developmental stages,  
172 and discovered that *matPlag1KO* embryos spent significantly longer time at the 2c stage  
173 compared to WT embryos (Fig. 4). The time spent at the zygote, 2c and 4c stages was  
174  $34.1\pm 0.5$ ,  $26.1\pm 0.4$  and  $14.8\pm 0.3$  h (mean $\pm$ SEM) in the *matPlag1KO* embryos compared to  
175  $33.1\pm 0.3$ ,  $23.1\pm 0.6$  and  $14.3\pm 0.4$  h in the WT, respectively. When 50% of WT embryos had  
176 processed to the 4c stage, all *matPlag1KO* embryos were still arrested at stage 2c (Fig 4,  
177 middle panel). When the *matPlag1KO* embryos proceeded beyond the 2c stage, normal



178 developmental pace was regained and the time spent at the 4c stage was not significantly  
179 different from WT (Fig. 4). The survival of the embryos (zygote to morula) did not differ  
180 between genotypes (73% in *matPlag1KO*, 60% in WT). In conclusion, maternal *Plag1*  
181 deficiency caused a delay in 2c stage embryo development without compromising embryo  
182 viability or further preimplantation development.

183 ***Two-cell stage matPlag1KO embryos exhibit delayed transcriptional program and***  
184 ***express Plag1 from paternal allele***

185 In order to better understand the effect of maternal *Plag1* deficiency on embryo development,  
186 we collected MII oocytes (21–23 h post chorionic gonadotropin treatment), 2c embryos  
187 (45–47 h post fertilization, hpf) and 8c embryos (71–73 hpf) for single embryo RNA-seq.  
188 Altogether, we sequenced and analyzed 45 WT and 45 *matPlag1KO* oocytes and embryos  
189 collected at three separate time points (Table S1). We used spike-in RNA for data  
190 normalization to correct for the large general changes in cellular RNA content during these  
191 developmental stages (Tohonen et al., 2015). The size of the spike-in reference RNA library  
192 recovered by RNA-seq did not vary between different genotypes or developmental stages,  
193 showing the robustness of the normalization strategy (Fig. S2). In contrast, the spike-in  
194 normalized embryo RNA-seq libraries showed a dramatic drop in embryonic poly(A) mRNA  
195 content from oocyte to 2c stage and a subsequent increase during 2c–8c transition (Fig. 5a).  
196 There were no significant differences in general mRNA amount between *matPlag1KO* and  
197 WT embryos at any stage (Fig. 5a). Analysis of differentially expressed genes (DEGs)  
198 showed that the majority of DEGs were downregulated in both genotypes from oocyte to 2c  
199 stage when maternal RNA degradation is known to take place. In that transition, there were  
200 6,832 and 6,044 DEGs downregulated in WT and *matPlag1KO* compared to 2,910 and 2,851  
201 being upregulated, respectively (Fig. 5b). More DEGs were upregulated in the 2c–8c  
202 transition, 3,636 in WT and 3,586 in *matPlag1KO*, when the zygotic genome becomes fully  
203 active (Fig. 5b).

204 We then compared WT and *matPlag1KO* embryos, and found that they differed most at the  
205 2c stage. The 2c *matPlag1KO* embryos had 530 downregulated and 559 upregulated DEGs  
206 compared to 2c WT embryos (Fig. 5c). A heat map clustered the embryos into three primary  
207 groups by developmental stage (MII oocyte, 2c, 8c) but at the 2c stage, the embryos also  
208 clustered by genotype (Fig. 5d). Principal component analysis likewise separated the  
209 embryos primarily by developmental stage, but also by genotype at the 2c stage (Fig. 5e).  
210 Finally, cell trajectory (pseudotime) analysis yielded a similar pattern, and further showed  
211 that the development of the *matPlag1KO* embryos transcriptionally lagged behind WT at the  
212 2c stage (Fig. 5f).

213 Next, we studied the expression pattern of the DEGs in *matPlag1KO* 2c stage embryos by  
214 plotting their mean expression levels from oocyte to 8c stage. We found that the DEGs  
215 upregulated in *matPlag1KO* embryos as compared to WT (n=559) were actually maternally  
216 loaded transcripts whose degradation was delayed in the *matPlag1KO* embryos as  
217 compared to WT embryos (Fig. 6a). Similarly, the DEGs downregulated in *matPlag1KO*  
218 embryos at the 2c stage (n=530) were in fact genes whose upregulation was delayed in the  
219 *matPlag1KO* embryos as compared to WT (Fig. 6a). We hereafter refer to these two sets of  
220 genes as “delayed-degradation” and “delayed-activation” genes. Interestingly, the expression  
221 level of the delayed-activation and delayed-degradation genes in *matPlag1KO* reached WT  
222 levels by the 8c stage, suggesting that the transcriptional dysregulation caused by the lack of  
223 maternal *Plag1* allele was temporary (Fig. 6a).

224 We next considered the expression profile of *Plag1* itself in the embryos. *Plag1* transcripts  
225 were present in WT oocytes, showing that *Plag1* is a maternally loaded factor (Fig. 6b). We  
226 also stained ovarian tissue sections and observed positive staining in secondary follicles  
227 within the oocyte nucleoli, confirming expression in growing oocytes (Fig. S3). In WT  
228 embryos, the maternally loaded *Plag1* transcripts were degraded by the 2c stage, and there  
229 was no further expression at the 8c stage, suggesting that *Plag1* is not normally expressed  
230 from the zygotic genome this early (Fig. 6c). A similar expression pattern was confirmed in

231 two independent embryo RNA-seq datasets in human, where *PLAG1* transcripts were  
232 present from oocyte to 4c stage, when ZGA takes place, and then downregulated (Fig. S4).  
233 As expected, *Plag1* transcripts were not detected in *matPlag1KO* oocytes. Surprisingly, they  
234 were present in the 2c stage *matPlag1KO* embryos (Fig. 6b). As there is no maternal *Plag1*  
235 allele in these embryos, the expression must stem from the paternal allele. Expression of  
236 paternal *Plag1* returned to baseline by the 8c stage (Fig. 6b). The expression levels of the  
237 other *Plag1* family members *Plagl1* and *Plagl2* were unaffected in *matPlag1KO* embryos as  
238 compared with WT (Fig. S5).

239 We next carried out gene ontology (GO) analysis on the delayed-activation and delayed-  
240 degradation gene sets to understand their functions. The delayed-activation genes clustered  
241 into categories relevant for ribosome biogenesis, RNA processing, and translation (Fig. 6c,  
242 File S2). The delayed-degradation genes showed less clear clustering. The largest clusters  
243 represented diverse GO categories, such as neurogenesis, cell communication,  
244 developmental and morphogenesis events (Fig 6c, File S2). We then compared these GO  
245 categories to those associated with normal mouse embryo development by GO-annotating  
246 the genes significantly up- and downregulated during 2c–8c transition in WT (File S3). The  
247 delayed-activation gene GOs showed higher semantic similarity with genes typically  
248 upregulated during 2c–8c transition in the WT [best match average (BMA) 0.792] than with  
249 those downregulated (BMA 0.531), while the delayed-degradation gene GOs showed higher  
250 similarity to genes normally downregulated between 2c–8c stages (BMA 0.714) than to those  
251 upregulated (BMA 0.445). These data confirmed that embryos that lack the maternal *Plag1*  
252 allele were characterized by delayed regulation of both maternal mRNA degradation and  
253 ZGA compared to WT embryos.

254 ***Mouse delayed-activation genes overlap with human ZGA genes and show enrichment***  
255 ***for the PLAG1 de novo motif***

256 In order to compare our earlier human embryo RNA-seq dataset (Tohonen et al., 2015) to  
257 our current mouse data, we converted the mouse and human genes to orthologous gene as  
258 well as to proteins, and used both gene and protein family-based approaches in subsequent  
259 comparisons. First, we compared gene expression changes during major ZGA between  
260 humans (4c–8c transition) and mice (2c–8c transition) in general using gene set analysis,  
261 and found highly significant overall similarities (Fig. 7a). We then compared the human ZGA  
262 genes with the genes expressed in mouse embryos at the 2c stage, and discovered that they  
263 were significantly enriched among the delayed-activation genes (Fig. 7b). We obtained the  
264 same result when using the more conservative  $\chi^2$  test that is based on significant DEGs only  
265 (whereas gene set analyses are based on ranked expression of all detected genes) (Fig. 7c).  
266 DEGs upregulated during human major ZGA showed a significant overlap with the  
267 *matPlag1KO* delayed-activation genes but not with delayed-degradation genes (Fig. 7c).  
268 Comparison of protein families yielded similar results (Fig. 7d).

269 We next studied the promoters of the delayed-activation genes. When enrichment of the  
270 database PLAG1 binding site (MA0163.1 in JASPAR) was studied, no significant differences  
271 were found between delayed-activation, delayed-degradation and not regulated genes (Fig.  
272 7e). Interestingly, when we used our PLAG1 *de novo* motif instead, significant enrichment  
273 was discovered in promoters of delayed-activation genes as compared to genes whose  
274 regulation was not affected by maternal lack of *Plag1* (Fig. 7e). Altogether, 132 delayed-  
275 activation genes had at least one PLAG1 *de novo* motif within –2,000 to +500 bp of their  
276 transcription start site (File S4). We then compared these mouse genes with those 94 human  
277 ZGA genes that contained a PLAG1 *de novo* motif (Fig 1b, File S1). Gene set analysis  
278 revealed that there was a significant overlap between the mouse and human genes,  
279 suggesting that ZGA genes containing a PLAG1 *de novo* motif are conserved between mice  
280 and humans (Fig 7f).

281 We finally wanted to know the functions of these conserved mouse and human genes. We  
282 GO-annotated them and compared the semantic similarity between the top 100 GO

283 categories associated to each gene set. Hierarchical clustering revealed that human ZGA  
284 and mouse delayed-activation genes clustered together to categories representing  
285 ribosomes, protein transport, translation, RNA processing, and protein metabolism (Fig 7g,  
286 File S5). Conversely, the GOs associated to mouse delayed-degradation genes clustered to  
287 groups representing morphogenesis, p53 signalling, and immune responses and showed  
288 little overlap with the human ZGA clusters (Fig 7g, File S5).

289 Collectively, our findings show that there is a conserved sets of genes harboring *PLAG1*  
290 binding motifs in their promoters that are activated during ZGA in mouse and human. Our  
291 data further suggests that these genes play roles in central cellular processes that relate to  
292 ribosomes, RNA and protein metabolism.

293

## 294 **Discussion**

295 In the present study, we have discovered a new role for oncogene *PLAG1* as a regulator of  
296 ZGA. We identified a motif containing a *PLAG1* binding site among the promoters  
297 upregulated during ZGA in human embryos, and showed that the lack of *Plag1* leads to an  
298 incomplete ZGA in mice on a transcriptional level with consequences for the timing of  
299 cleavage stage development.

300 Our studies on *Plag1KO* mice confirmed many of the earlier observations, including growth  
301 restriction and subfertility (Hensen et al., 2004). *Plag1KO* females produced small litters  
302 regardless of the paternal genotype, implying that this phenotype was caused by the lack of  
303 *Plag1* allele in the mother. Still, we could not find any significant differences in histology or  
304 function of reproductive organs between *Plag1KO* and WT females. Their ovaries contained  
305 normal numbers of follicles at all developmental stages, an equivalent number of oocytes  
306 were ovulated, and their litter frequency was not affected. *Plag1KO* uteri had normal  
307 histology and did not transcriptionally differ from WT. We note that the *Plag1KO* uteri  
308 remained slightly smaller than WT even after body weight adjustment, which could perhaps

309 impose spatial constraints to implantation. However, “uterine crowding” has not been found to  
310 affect fetal viability in rabbits or mice (Argente et al., 2017; Bruce and Wellstead, 1992),  
311 suggesting that smaller uterine size does not necessarily reduce implantation rate or  
312 compromise post-implantation survival. We conclude that *Plag1* is not required for normal  
313 ovarian or uterine function. This suggests that embryos derived from *Plag1KO* females,  
314 regardless of paternal genotype, do not have the same developmental potential as WT  
315 embryos do, and are even different from HET embryos that have inherited the mutant allele  
316 from the father. In order to focus on the maternal effect of *Plag1*, we compared *Plag1KO*  
317 oocytes fertilized by WT studs (*matPlag1KO* embryos) with WT embryos.

318 We discovered that *matPlag1KO* embryos spent significantly more time in the 2c stage  
319 compared to WT embryos. Interestingly, major ZGA takes place in the 2c stage of mouse  
320 development, and failure to activate the zygotic genome leads to a developmental arrest. For  
321 example, knockdown of the pluripotency factor *Lin28* in mouse embryos leads to arrest at the  
322 2c–4c stage (Vogt et al., 2012), and KO of the maternal-effect gene *Mater* to arrested  
323 embryonic development at the 2c stage (Tong et al., 2000). ZGA is accomplished with the  
324 help of maternally loaded factors, *i.e.*, transcripts and proteins that are deposited into the  
325 oocyte. We showed that *Plag1* was a maternally loaded factor that could be detected in  
326 nucleoli of oocytes within growing follicles by staining, and in mature mouse and human  
327 oocytes by RNA-seq. *MatPlag1KO* embryos lacked maternally loaded *Plag1* and were  
328 delayed at 2c stage development suggesting that *Plag1* is required for normal cleavage-  
329 stage embryo development.

330 Despite lacking maternal *Plag1*, *matPlag1KO* embryos developed to the blastocyst stage  
331 with equal efficiency as WT embryos. Interestingly, *matPlag1KO* embryos started expressing  
332 *Plag1* from the paternal allele, which WT embryos did not do, and this may have rescued  
333 their development. Although these data argue that *Plag1* is essential for embryo  
334 development, we noted that even homozygous *Plag1KO* intercrosses occasionally produced  
335 litters. We hypothesize that maternally loaded *Plagl2*, the *Plag1* family member with

336 redundant activity to *Plag1*, might rescue embryo development in some cases. Testing the  
337 hypothesis would require generation of *Plag1/PlagL2* double KO mice, which is impossible  
338 due to the severe phenotype of *PlagL2* mice. *PlagL2KO* pups die shortly after birth to  
339 starvation due to their inability to absorb chylomicrons (Van Dyck et al., 2007).

340 Although *matPlag1KO* embryos regained normal developmental pace after exiting the 2c  
341 stage, their developmental success was not the same as that of WT embryos. Interestingly,  
342 human embryos can be scored after *in vitro* fertilization through morphokinetic  
343 measurements, and the time an embryo spends in the 2c and 4c stages is a significant  
344 determinant of developmental potential (Wong et al., 2010). The disrupted regulation of over  
345 1,000 genes at the 2c stage in *matPlag1KO* embryos, when not only ZGA but also epigenetic  
346 changes take place, could have permanent effects on the competence of the blastocysts.  
347 Moreover, synchronous preparation of both the embryo and endometrium for implantation is  
348 a prerequisite for successful implantation during the window of receptivity. Therefore, a  
349 simple delay in preimplantation development could lead to some blastocysts missing this  
350 critical window (Wang and Dey, 2006).

351 The PLAG1 *de novo* motif in humans frequently localized within Alu elements in the  
352 promoters of the ZGA genes. Alu elements are transposable elements ubiquitously present  
353 in primate genomes with involvement in gene regulation by various mechanisms (Elbarbary  
354 et al., 2016). The counterparts of Alu elements in the mouse genome are B1 elements  
355 (Labuda et al., 1991). Mouse B1 and primate Alu have split from the common ancestor  
356 7SLRNA over 80 million years ago and have evolved and retrotransposed independently  
357 ever since (Ullu and Tschudi, 1984). Despite independent evolution, the densities of these  
358 elements in promoters of orthologous genes in humans and mice are surprisingly correlated  
359 (Mouse Genome Sequencing et al., 2002; Polak and Domany, 2006), and genes containing  
360 Alu and B1 elements belong to highly correlated functional categories (Tsirigos and  
361 Rigoutsos, 2009). Both Alu and B1 elements are highly enriched in promoters that are  
362 activated during ZGA, and the number of copies in the promoter correlates with the level of

363 gene upregulation (Ge, 2017). It is interesting that the component of the Alu element  
364 containing the PLAG1 binding site was well-conserved in the mouse B1 element.  
365 Collectively, these findings suggested that the SINEs Alu and B1 play a role in ZGA in  
366 humans and mice by attracting transcription factors such as PLAG1 to gene promoters. Our  
367 data further showed that the database PLAG1 binding site alone did not show any  
368 enrichment in the promoters of delayed-activation genes. This suggested that PLAG1 works  
369 in concert with other transcription factors and co-regulators and therefore the short binding  
370 site does not accurately reflect the DNA sequence required for PLAG1-stimulated gene  
371 expression. This is a largely unexplored area that should be a focus of follow-up studies.

372 Functional annotation categories associated to delayed-activation genes in the *matPlag1KO*  
373 embryos were mainly related to ribosome biogenesis, maturation and function. Even when  
374 we restricted the analysis to only those genes containing a PLAG1 *de novo* motifs, GO-  
375 analyses suggested roles in ribosome biogenesis, RNA and protein metabolism. Importantly,  
376 human ZGA genes with PLAG1 *de novo* motif had a very similar GO profile. Alu elements  
377 have been suggested to function as enhancer elements that regulate gene transcription (Su  
378 et al., 2014), and Alu elements are enriched in promoters associated to ribosome biogenesis,  
379 protein biosynthesis and RNA metabolism (Polak and Domany, 2006) as well as to ZGA (Ge,  
380 2017). It is a plausible hypothesis that Alu elements in the promoters of ribosomal function  
381 genes attract PLAG1 that then regulates the associated gene. Many oncogenes have effects  
382 on ribosome biogenesis, which enables cancerous cells to increase protein synthesis and  
383 grow rapidly (Pelletier et al., 2018). Although *PLAG1* is an oncogene, its potential role in  
384 ribosome biogenesis and protein synthesis has not been evaluated. Interestingly, one of the  
385 most striking phenotypes of the *Plag1KO* mice is their small size (Hensen et al., 2004). In  
386 addition, *PLAG1* polymorphisms associate with body size and growth in farm animals and  
387 humans (Fink et al., 2017; Rubin et al., 2012; Utsunomiya et al., 2013; Zhang et al., 2016).  
388 Based on our data, we hypothesize that *PLAG1/Plag1* associated growth effects could result  
389 from modulation of protein synthesis that affects cell size and division rate.



390 We conclude that the lack of maternally loaded *Plag1* leads to delayed ZGA and 2c stage  
391 development, and reduced embryo competence for implantation. The effect on ZGA genes  
392 arose through retrotransposition of Alu and B1 elements that harbour conserved PLAG1  
393 binding sites. The genes affected by the lack of PLAG1 have roles in ribosome biogenesis,  
394 RNA and protein metabolism. Follow-up studies should focus on Alu and B1 elements in  
395 preimplantation development and a deeper analysis of PLAG1 involvement in protein  
396 synthesis, as this is a mechanism that would explain many of the reported biological activities  
397 of PLAG1, including tumorigenicity, cell proliferation, and growth.

398

## 399 **Materials and Methods**

### 400 ***Mouse colony and handling***

401 All experiments were approved by the Swedish Board of Agriculture (#S5-14) and performed  
402 in accordance to the ethical licence. *Plag1KO* mice (Hensen et al., 2004), backcrossed to the  
403 CD1 strain, were a kind gift from Prof. Wim Van de Ven (University of Leuven, Belgium) and  
404 Dr. Carol Schuurmans (University of Calgary, Canada). The local colony at Karolinska  
405 Institutet was established through embryo transfers. HET animals were kept in continuous  
406 breeding, and the litters were earmarked, weaned and weighed at the age of 3–4 weeks. Ear  
407 punches were used for genotyping with primers *Plag1MT\_F* (5'-  
408 CAGTTCCCAGGTGTCCAACAAG-3'), *Plag1MT\_R* (5'-AATGTGAGCGAGTAACAACCCG-  
409 3'), *Plag1WT\_F* (5'-CGGAAAGACCATCTGAAGAATCAC -3'), and *Plag1WT\_R* (5'-  
410 CGTTCGCAGTGCTCACATTG -3'). The animals were housed in standard conditions  
411 (19–21°C, 55% humidity, lights 6:00 am–6:00 pm) with free access to feed (irradiated Global  
412 18% diet 2918; Envigo, Huntingdon, UK) and tap water. In all experiments, animals were  
413 sacrificed by cervical dislocation.

### 414 ***Superovulation and embryo imaging***

415 Sexually mature 1-3 months old *Plag1KO* and WT females were superovulated by i.p.  
416 injections of 5 IU pregnant mare serum (Folligon; Intervet, Dublin, Ireland), followed two days  
417 later by 5 IU human chorionic gonadotropin (hCG) (Chorulon; Intervet, Dublin, Ireland), and  
418 mated with trained WT studs. MII oocytes (no mating) and zygotes were collected from  
419 oviducts the following morning and their numbers recorded. Cumulus cells were removed  
420 with hyaluronidase (0.3 mg/ml, Sigma-Aldrich, St.Louis, MO, USA) treatment. For imaging,  
421 zygotes were placed 2–4 per well into Primo Vision embryo culture dishes (Vitrolife,  
422 Göteborg, Sweden) under a Nikon Ti-E spinning disk wide-field microscope with a live-cell  
423 imaging incubator. The microscope was programmed to take bright-field images every 30  
424 min with an Andor EM-CCD camera using the 20× objective for a total of 90 h 30 min. The  
425 imaging was repeated three times with embryos from a total of 5 *Plag1KO* (providing 103

426 embryos) and 6 WT (providing 89 embryos) females with both genotypes present at every  
427 session. Cleavage events until the 8c stage were scored manually from the images by a  
428 researcher blind to the genotypes.

#### 429 ***Histological assessment of ovaries and uteri***

430 Ovaries and uteri were collected during superovulation experiments, their weights recorded,  
431 and tissues stored in 4% (w/v) paraformaldehyde. Fixative was changed to 70% ethanol,  
432 tissue embedded in paraffin and processed to 4- $\mu$ m hematoxylin-eosin stained sections, and  
433 the slides were digitalized with Mirax Slide Scanner (Zeiss, Göttingen, Germany). Transverse  
434 sections from the middle of the uterine horn were used for histological examination. One  
435 section from the middle of the ovary was used for assessment of follicles in different  
436 developmental categories (preantral, antral, atretic and corpora lutea) and their number  
437 adjusted for the ovary surface area using Panoramic Viewer software (3DHistech,  
438 Budapest, Hungary). Altogether, 22 *Plag1KO* and 13 WT animals were used for ovary  
439 assessment, and 8 *Plag1KO* and 8 WT for uterus histology.

#### 440 ***X-gal staining***

441 Ovaries were collected from 3 *Plag1KO* and 3 WT females, aged 5 months, fixed,  
442 cryosectioned and subjected to X-gal staining and Nuclear Fast Red counterstaining as  
443 described before (Juma et al., 2017).

#### 444 ***Implantation study***

445 *Plag1KO* and WT females, aged 2-4 months, were mated with trained WT studs. The uteri  
446 were collected 7.5–8.5 dpc and the number of implantation sites counted. The experiment  
447 was carried out twice, with a total of 8 *Plag1KO* and 8 WT females.

#### 448 ***Single-embryo RNA-seq***

449 Zygotes collected from superovulated females (see “superovulation and embryo imaging”  
450 above) were treated with hyaluronidase and placed in KSOM medium (EMD Millipore,  
451 Nottingham, UK) under ovoil-100 (Vitrolife) in IVF 4-well plates (Sigma-Aldrich) for culture at  
452 37°C under 5% CO<sub>2</sub>/95% air. Single embryos or uncultured MII oocytes were picked into 4  $\mu$ l

453 library lysis buffer containing 5 mM Tris-HCl pH 8.0 (Sigma-Aldrich), 2 mM dNTP mixture  
454 (ThermoFisher Scientific, Waltham, MA, USA), 10 mM DTT (Sigma-Aldrich), 0.05% Triton X-  
455 100 (Sigma-Aldrich), 400 nM anchored oligo(dT) primer biotin-  
456 TTAAGCAGTGGTATCAACGCAGAGTCGAC(T)<sub>29</sub>V where V is LNA nucleotide (Exiqon,  
457 Vedbaek, Denmark), and 4 U RiboLock RNase inhibitor (ThermoFisher). Embryos were  
458 picked 21–23 h post hCG treatment (MII oocytes, no culture), 45–47 hpf (2c stage) and  
459 71–73 hpf (8c stage) on three different occasions, yielding a total of 16 zygotes, 14 2c stage  
460 embryos, and 15 8c stage embryos for both *matPlag1KO* and WT (Table S1). Two separate  
461 46-plex libraries (libA and libB) were made as described previously (Krjutskov et al., 2016)  
462 with the following modifications: barcoded 10 μM template-switching oligonucleotides were  
463 added prior to reverse transcriptase, ERCC spike-in Mix A was diluted 15,300-fold with clean  
464 water, and 1 μl was taken per library reverse transcriptase master mix. Twenty cycles of PCR  
465 were used for the first round of amplification and ten additional cycles for the second round to  
466 introduce Illumina-compatible universal sequences. Both libraries contained all  
467 developmental stages and genotypes.

#### 468 ***Uterus RNA-seq***

469 Uterine horns from 8 *Plag1KO* and 8 WT females used in the superovulation experiments  
470 were collected in RNAlater (Ambion, Foster City, CA, USA). At dissection, uterine horns were  
471 cut in half longitudinally, and the endometrial side was gently scraped with a scalpel (Fig.  
472 S1). RNA was extracted with the RNeasy mini kit (Qiagen, Hilden, Germany) and quality  
473 measured with the Agilent 2100 BioAnalyzer (Agilent Technologies, Santa Clara, CA, USA).  
474 Ten nanograms of high-quality RNA (RIN>8) was used for RNA-seq. The RNA-seq was  
475 performed according to the modified STRT protocol (Krjutskov et al., 2016).

#### 476 ***RNA-seq data analysis***

477 The analysis was performed as described previously (Krjutskov et al., 2016). In short, the  
478 reads were filtered, samples de-multiplexed, UMI-s joined, reads trimmed and mapped to the  
479 reference mouse genome mm9 by TopHat (Kim et al., 2013). The resulting bam files were  
480 converted to tag directories employing Homer (Heinz et al., 2010) and were subsequently

481 used to estimate the reads in all annotated genes. Annotations were in GTF file format  
482 retrieved from UCSC and were concatenated to a GTF file with the ERCC annotations. Gene  
483 counts were then imported to R (R Development Core Team, 2010) and libraries with a  
484 median gene expression of log<sub>2</sub> counts per million (cpm) under 0 were excluded from further  
485 analysis. Cell libraries, excluding the ERCC spike-in counts, were normalized with EdgeR  
486 (Robinson et al., 2010) using the TMM normalization method. The ERCC counts were used  
487 for normalization between the various embryonic cell stages by scaling the library sizes.  
488 EdgeR was also employed for the subsequent differential gene expression analysis, which  
489 was performed on genes that had 1 cpm in at least five or more samples and the rest of the  
490 genes were filtered out. After removing the low expressing/unexpressed genes, the gene  
491 counts were renormalized.

492 Principal component analysis was performed in R by using the genes that were significant in  
493 any of the comparisons between the genotypes. Heatmaps were plotted on TMM normalized  
494 counts exported from EdgeR and gene expression was standardized across all samples  
495 (mean=0 and sd=1). Samples and genes were clustered using hierarchical clustering in R  
496 and plotted employing the ComplexHeatmap library (Gu et al., 2016). The same gene set  
497 was used for the cell trajectory (pseudotime) analysis by the monocle package (Trapnell et  
498 al., 2014).

499 Gene ontology analysis was carried out in R (R Development Core Team, 2010) with the  
500 topGO library. To identify enriched gene ontology terms, the classic algorithm and Fisher  
501 statistic were used and analysis was carried out on up- and downregulated genes separately.  
502 Semantic similarity between the GO terms was calculated using the Wang algorithm in  
503 GOSemSim bioconductor package (Yu et al., 2010). The result is given as the best match  
504 average (BMA) score that ranges from 0 to 1.

505 Gene set enrichment analysis was conducted to test whether the mouse genes homologous  
506 to the human genes regulated between the 4c and 8c stage were also regulated in mouse  
507 development. To calculate the p-values, the geneSetTest function from the limma package  
508 (Ritchie et al., 2015) was used. The moving average of the enrichment was calculated with

509 the tricubeMovingAverage function and plotted with ggplot2. Homologene from NCBI was  
510 used to convert the human genes to the homologous mouse genes. The significance in  
511 overlap of the human genes with the mouse genes regulated by the *Plag1KO* at the 2c stage  
512 was calculated with the Fisher test in R. Genes were also converted to protein families using  
513 the bioconductor libraries for genome-wide annotation for human and mouse  
514 (org.Hs.eg.db/org.Mm.eg.db). For genes that had more than one protein family annotated to  
515 them, only one of the protein families was used in order not to inflate the number of  
516 overlapping or non-overlapping families between the different gene groups.

### 517 **Promoter analyses**

518 Human embryo promoter sequence analysis was performed as previously described  
519 (Tohonen et al., 2015). In brief, the *de novo* motif was compared with known motifs by  
520 TomTom (Gupta et al., 2007). We applied MEME (Bailey and Elkan, 1994) for motif analysis  
521 within the upregulated promoters, and identified similar sequences with the PLAG1 motif  
522 (MA0163.1 in JASPAR (Meng et al., 2005; Sandelin et al., 2004)) by MAST (Bailey and  
523 Gribskov, 1998). The location of Alu elements within the promoters was based on the  
524 RepeatMasker track in the UCSC Genome Browser.

525 Human and mouse SINE repetitive elements DF0000002 (AluY), DF0000051 (AluSz),  
526 DF0000034 (AluJo), DF0000144 (FLAM\_C), DF0000016 (7SLRNA), DF0003101 (PB1) and  
527 DF0001733 (B1\_Mm) were retrieved from the Dfam database (Hubley et al., 2016) and  
528 aligned and highlighted according to the percent identity by JalView2.

529 Mouse embryo promoter analysis was carried out with Homer (Heinz et al., 2010). The  
530 JASPAR (Sandelin et al., 2004) PLAG1 motif (MA0163.1) (Meng et al., 2005) and the *de*  
531 *novo* motifs (Tohonen et al., 2015) were used, and all annotated transcriptional start sites  
532 were scanned for the presence of the motifs from 2,000 bp upstream to 500 bp downstream  
533 of the transcriptional start site. Enrichment was analysed using Fischer's exact test.

### 534 **Statistical analysis**

535 Continuous data were analyzed with Student's t-test or one-way ANOVA (one categorical  
536 predictor) or two-way ANOVA (two categorical predictors) followed by Fischer LSD *post hoc*  
537 testing when necessary. Normality was tested with the Shaphiro Wilks test and  
538 homoscedasticity with Levene's test. Categorical data were analyzed with the  $\chi^2$  test. The  
539 exit time of embryos from each developmental stage was plotted as an empirical distribution  
540 function (ecdf) using ggplot2. To test the significance between the exit times of the WT and  
541 *matPlag1KO* embryos, the Kolmogorov-Smirnov test was used. All analyses were carried out  
542 using R (R Development Core Team, 2010). All p-values are two-tailed and were considered  
543 significant when  $p < 0.05$ .

#### 544 **Data Availability**

545 RNA-seq data have been deposited to Gene Expression Omnibus data repository as a  
546 SuperSeries record under the reference GSE111040.

547

#### 548 **Acknowledgements and funding**

549 Prof Wim Van de Ven is particularly acknowledged for giving us access to the *Plag1KO*  
550 animal model, and Dr Schuurmans for sending the mice to us. Stanisław Wawrzyczek is  
551 thanked for assistance with X-gal staining and Ingegerd Fransson for mouse genotyping and  
552 library preparation. This study was performed in part at the Preclinical Laboratory (PKL)  
553 animal facility and the Live Cell Imaging unit, Department of Biosciences and Nutrition,  
554 Karolinska Institutet, Sweden, supported by grants from the Knut and Alice Wallenberg  
555 Foundation, the Swedish Research Council, the Centre for Innovative Medicine and the  
556 Jonasson donation to the School of Technology and Health, Royal Institute of Technology,  
557 Sweden. The morphological phenotype analysis (FENO) core facility and Tarja Schröder are  
558 thanked for the preparation of the histological specimens. The computations were performed  
559 on resources provided by SNIC through Uppsala Multidisciplinary Center for Advanced  
560 Computational Science (UPPMAX) under projects b2010037 and snic2017-7-317. The study  
561 was supported by Knut and Alice Wallenberg Foundation (KAW2015.0096) and by the

562 Distinguished Professor Award by Karolinska Institutet to JK. Essential funding was also  
563 provided by Jane & Aatos Erkkö Foundation to PD.

564



## 565 **Figure legends**

566

567 **Figure 1. A *de novo* DNA motif that harbors a known PLAG1 binding site is found in**  
568 **the promoters of genes upregulated during ZGA in humans.**

569 **a)** Comparison of the JASPAR PLAG1 binding motif (MA0163.1, top) and the PLAG1 *de*  
570 *novo* motif (bottom). **b)** Location of source sites for the PLAG1 *de novo* motifs (red dots) and  
571 similar sites (yellow dots) in the promoters of human major ZGA genes. Promoters of the 93  
572 genes containing the motifs are stacked and aligned ranging from 2,000 upstream bases to  
573 500 downstream bases around transcription start site (TSS, dashed line). The genes are  
574 listed in File S1. Locations of AluJ, AluS and AluY elements are highlighted in grey. The  
575 curve on top of the figure illustrates the density of the PLAG1 *de novo* motif along the  
576 promoter. **c)** Comparisons of our earlier ZGA *de novo* motif (i) (Tohonen et al., 2015), the  
577 current PLAG1 *de novo* motif (ii), known PDR-like transcription factor binding site (iii) (Jolma  
578 et al., 2013) and PLAG1 JASPAR (iv) (Meng et al., 2005) and consensus (v) (Voz et al.,  
579 2000) binding sites with human and mouse short interspersed nuclear elements (SINE). The  
580 consensus motif (v) is described by IUPAC notation; R is purine (G or A), and K is keto (G or  
581 T). The internal RNA polymerase III promoter, A-box, is indicated. The *de novo* motifs and  
582 binding motifs are reverse-complemented. Sequences of AluY, AluSz, AluJo, FLAM\_C,  
583 7SLRNA, PB1 and B1\_Mm were extracted from the Dfam database of repetitive DNA  
584 elements. ZGA, zygotic genome activation; TF, transcription factor

585

586 **Figure 2. *Plag1* deficiency affects body weight, litter size, and breeding success.**

587 **a)** Observed and expected numbers of pup genotypes in litters from heterozygous  
588 intercrosses. **b)** Body weights of female and male pups at weaning. **c)** Mean number of pups  
589 in litters from different parent genotypes. **d)** Mean number of implanted embryos on 7.5–8.5

590 dpc, and **e)** representative photos of uteri at dissection. Asterisks indicate implanted  
591 embryos. Scale bars are 1 cm. **f)** Frequency of litters from breeding pairs of different  
592 genotypes maintained in continuous breeding for 90 days. Every breeding pair is represented  
593 with a horizontal line and the birth of a litter is illustrated with a circle. Quantification of the  
594 data is shown on the right. The data are presented as means + SEM and the number of  
595 observations is shown inside the columns. Statistical analysis by  $\chi^2$  test (a) or one-way  
596 ANOVA followed by Fisher LSD post hoc test (b-f). \*  $p < 0.05$ , \*\*  $p < 0.01$ , \*\*\*  $p < 0.001$ . F,  
597 female; HET, heterozygous; KO, knockout; M, male; WT, wild type.

598

599 **Figure 3. *Plag1* deficiency does not have significant effects on ovaries and uterus.**

600 **a)** Number of oocytes collected after superovulation presented as violin plots. The median is  
601 marked as a red line. **b)** Absolute and relative (body weight-adjusted) weights of ovaries,  
602 means + SEM. **c)** Representative images of hematoxylin-eosin stained ovarian cross  
603 sections from WT and *Plag1KO* mice. The scale bar is 1 mm. **d)** Numbers of preantral, antral  
604 and atretic follicles as well as corpora lutea (CL) per mm<sup>2</sup> of ovary. Data are presented as  
605 median (red line), interquartile ranges (box), and non-outlier ranges (whisker). Outliers are  
606 depicted as dots. **e)** Representative photos and hematoxylin-eosin stained histological  
607 images of WT and *Plag1KO* uteri. The scale bar is 500  $\mu$ m. **f)** Absolute and relative (body  
608 weight-adjusted) uterine weights presented as means + SEM (n=8). **g)** Principal component  
609 analysis of global gene expression in WT and *Plag1KO* uterus samples divided into “uterus”  
610 (a piece of uterine horn) (n=8), “mucosa” (cells scraped from the endometrial surface of the  
611 uterine horn) (n=8), and “myometrium” (tissue left after mucosa has been removed) (n=8).  
612 Statistical analysis by t-test (a, b, f) or two-way ANOVA (d), \*\*\* $p < 0.001$ . CL, corpus luteum;  
613 KO, knockout; PC, principal component; WT, wild type.

614

615 **Figure 4: *MatPlag1KO* embryos spend significantly more time in the 2c stage**  
616 **compared to WT embryos.**

617 The time spent in each developmental stage for each embryo (exit time) was plotted as an  
618 empirical distribution function. Plots show the cumulative proportion of embryos (y-axis, 0–1)  
619 that have exited the corresponding developmental stage at each time point (x-axis, hours).  
620 To test the significance between the exit times of the WT (n=53) and *matPlag1KO* (n=75)  
621 embryos, the Kolmogorov-Smirnov test was used.

622

623 **Figure 5. Single-embryo RNA-seq distinguishes *matPlag1KO* embryos from WT**  
624 **embryos at the 2c stage.**

625 **a)** Size of the spike-in normalized RNA-seq libraries by genotype and developmental stage.  
626 The line represents the median, the box first and third quartiles, and the whisker non-outlier  
627 range. Outliers are depicted as dots and defined as data points >1.5 times interquartile range  
628 outside range. One sequencing reaction equals one embryo, and the number of embryos  
629 (biological replicates) used for sequencing is given in the figure. **b)** Number of differentially  
630 expressed genes from one developmental stage to another (horizontal arrows) in  
631 *matPlag1KO* and WT embryos. **c)** Number of differentially expressed genes between  
632 *matPlag1KO* and WT embryos at MII oocyte, 2c and 8c stage. **d)** Heat map, **e)** principal  
633 component analysis, and **f)** pseudotime (cell trajectory) analysis based on all differentially  
634 expressed genes in the libraries. 2c, 2-cell stage; 8c, 8-cell stage; DEG, differentially  
635 expressed gene; KO, knockout; PC, principal component; WT, wild type.

636

637 **Figure 6. *MatPlag1KO* embryos have a delayed transcriptional program, start**  
638 **expressing *Plag1* from the paternal allele at the 2c stage, and catch up with WT**  
639 **embryos by the 8c stage.**

640 **a)** Mean normalized expression (Z) pattern of the 559 genes that are significantly  
641 upregulated (“delayed-degradation”) and the 503 that are significantly downregulated  
642 (“delayed-activation”) in *matPlag1KO* embryos compared to WT embryos at the 2c stage. **b)**  
643 Normalized expression of *Plag1* in the embryos at MII oocyte, 2c and 8c stages. **c)** Heat  
644 maps displaying semantic similarity among the top 150 significantly enriched GO terms  
645 associated to the delayed-degradation (left) and delayed-activation (right) genes. Five largest  
646 clusters are depicted (cl1–cl5), and common denominators among GO terms belonging to  
647 these clusters are shown. The full GO lists are provided in File S2. 2c, 2-cell stage; 8c, 8-cell  
648 stage; CPM, counts per million; GO, gene ontology; KO knockout; WT, wildtype.

649

650 **Figure 7. *MatPlag1KO* delayed-activation genes show a significant overlap with human**  
651 **ZGA genes as well as enrichment of the PLAG1 *de novo* motif in their promoters.**

652 **a)** Gene set enrichment analysis comparing gene expression changes from mouse 2c–8c  
653 stage (x-axis) with human 4c–8c gene expression changes (y-axis). **b)** Gene set enrichment  
654 analysis comparing genes that are expressed in mouse embryos (WT and *matPlag1KO*) at  
655 the 2c stage (x-axis) with human 4c–8c gene expression changes (y-axis). Black vertical  
656 lines shows the location of human genes among the ranked mouse genes, and curve depicts  
657 the enrichment. Red dotted line indicates “no enrichment” level. **c)** Venn diagram showing  
658 the overlap between *matPlag1KO* delayed-activation and delayed-degradation genes with  
659 the human major ZGA genes. **d)** Venn diagram showing the same overlaps based on protein  
660 families instead of genes. **e)** Presence of PLAG1 database binding sites and PLAG1 *de novo*  
661 motifs in the promoters of genes expressed in mouse 2c stage embryos. Total number of  
662 genes in different categories as well as number of unique genes with the motif are shown.  
663 Enrichment over not affected genes was analyzed with Fischer’s exact test. \*\*\* $p < 0.001$ . **f)**  
664 Gene set enrichment analysis as in b) but only displaying those human and mouse genes  
665 with a PLAG1 *de novo* motif in their promoters. **g)** t-SNE plot demonstrating similarity among

666 the top 100 GO categories associated to human ZGA, mouse delayed-activation and mouse  
667 delayed-degradation genes that contain PLAG1 *de novo* motifs. Eight largest clusters with  
668 the most common words within the clusters are shown. 2c, 2-cell stage; 4c, 4-cell stage; 8c,  
669 8-cell stage; KO, knockout; OR, odds ratio; WT, wild type.

670

671 **Movie 1: Time-lapse video of WT embryo development**

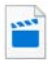

672 Movie 1.avi

673 A representative movie of WT mouse embryo development from zygote to blastocyst. The  
674 video time line is indicated (0-89 h) as well as the time spent in 2c stage.

675

676 **Movie 2: Time-lapse video of *matPlag1KO* embryo development**



677 Movie 2.avi

678 A representative movie of *matPlag1KO* mouse embryo development from zygote to  
679 blastocyst. The video time line is indicated (0-89 h) as well as the time spent in 2c stage.

680

## 681 References

- 682 **Argente, M. J., Calle, E. W., Garcia, M. L. and Blasco, A.** (2017). Correlated response in litter size  
683 components in rabbits selected for litter size variability. *J Anim Breed Genet* **134**, 505-511.
- 684 **Bailey, T. L. and Elkan, C.** (1994). Fitting a mixture model by expectation maximization to discover  
685 motifs in biopolymers. *Proc Int Conf Intell Syst Mol Biol* **2**, 28-36.
- 686 **Bailey, T. L. and Gribskov, M.** (1998). Combining evidence using p-values: application to sequence  
687 homology searches. *Bioinformatics* **14**, 48-54.
- 688 **Bruce, N. W. and Wellstead, J. R.** (1992). Spacing of fetuses and local competition in strains of mice  
689 with large, medium and small litters. *J Reprod Fertil* **95**, 783-789.
- 690 **De Iaco, A., Planet, E., Coluccio, A., Verp, S., Duc, J. and Trono, D.** (2017). DUX-family transcription  
691 factors regulate zygotic genome activation in placental mammals. *Nat Genet* **49**, 941-945.
- 692 **Elbarbary, R. A., Lucas, B. A. and Maquat, L. E.** (2016). Retrotransposons as regulators of gene  
693 expression. *Science* **351**, aac7247.
- 694 **Fink, T., Tiplady, K., Lopdell, T., Johnson, T., Snell, R. G., Spelman, R. J., Davis, S. R. and Littlejohn,  
695 M. D.** (2017). Functional confirmation of PLAG1 as the candidate causative gene underlying  
696 major pleiotropic effects on body weight and milk characteristics. *Sci Rep* **7**, 44793.
- 697 **Ge, S. X.** (2017). Exploratory bioinformatics investigation reveals importance of "junk" DNA in early  
698 embryo development. *BMC Genomics* **18**, 200.
- 699 **Gu, Z., Eils, R. and Schlesner, M.** (2016). Complex heatmaps reveal patterns and correlations in  
700 multidimensional genomic data. *Bioinformatics* **32**, 2847-2849.
- 701 **Gupta, S., Stamatoyannopoulos, J. A., Bailey, T. L. and Noble, W. S.** (2007). Quantifying similarity  
702 between motifs. *Genome Biol* **8**, R24.
- 703 **Heinz, S., Benner, C., Spann, N., Bertolino, E., Lin, Y. C., Laslo, P., Cheng, J. X., Murre, C., Singh, H.  
704 and Glass, C. K.** (2010). Simple combinations of lineage-determining transcription factors  
705 prime cis-regulatory elements required for macrophage and B cell identities. *Mol Cell* **38**,  
706 576-589.
- 707 **Hensen, K., Braem, C., Declercq, J., Van Dyck, F., Dewerchin, M., Fiette, L., Deneff, C. and Van de  
708 Ven, W. J.** (2004). Targeted disruption of the murine Plag1 proto-oncogene causes growth  
709 retardation and reduced fertility. *Dev Growth Differ* **46**, 459-470.
- 710 **Hensen, K., Van Valckenborgh, I. C., Kas, K., Van de Ven, W. J. and Voz, M. L.** (2002). The  
711 tumorigenic diversity of the three PLAG family members is associated with different DNA  
712 binding capacities. *Cancer Res* **62**, 1510-1517.
- 713 **Hubley, R., Finn, R. D., Clements, J., Eddy, S. R., Jones, T. A., Bao, W., Smit, A. F. and Wheeler, T. J.**  
714 (2016). The Dfam database of repetitive DNA families. *Nucleic Acids Res* **44**, D81-89.
- 715 **Jolma, A., Yan, J., Whittington, T., Toivonen, J., Nitta, K. R., Rastas, P., Morgunova, E., Enge, M.,  
716 Taipale, M., Wei, G., et al.** (2013). DNA-binding specificities of human transcription factors.  
717 *Cell* **152**, 327-339.
- 718 **Jouhilahti, E. M., Madisson, E., Vesterlund, L., Tohonon, V., Krjutskov, K., Plaza Reyes, A.,  
719 Petropoulos, S., Mansson, R., Linnarsson, S., Burglin, T., et al.** (2016). The human PRD-like  
720 homeobox gene LEUTX has a central role in embryo genome activation. *Development* **143**,  
721 3459-3469.
- 722 **Jukam, D., Shariati, S. A. M. and Skotheim, J. M.** (2017). Zygotic Genome Activation in Vertebrates.  
723 *Dev Cell* **42**, 316-332.
- 724 **Juma, A. R., Damdimopoulou, P. E., Grommen, S. V., Van de Ven, W. J. and De Groef, B.** (2016).  
725 Emerging role of PLAG1 as a regulator of growth and reproduction. *J Endocrinol* **228**, R45-56.
- 726 **Juma, A. R., Grommen, S. V. H., O'Bryan, M. K., O'Connor, A. E., Merriner, D. J., Hall, N. E., Doyle, S.  
727 R., Damdimopoulou, P. E., Barriga, D., Hart, A. H., et al.** (2017). PLAG1 deficiency impairs  
728 spermatogenesis and sperm motility in mice. *Sci Rep* **7**, 5317.

- 729 **Kas, K., Voz, M. L., Roijer, E., Astrom, A. K., Meyen, E., Stenman, G. and Van de Ven, W. J.** (1997).  
730 Promoter swapping between the genes for a novel zinc finger protein and beta-catenin in  
731 pleiomorphic adenomas with t(3;8)(p21;q12) translocations. *Nat Genet* **15**, 170-174.
- 732 **Kim, D., Perte, G., Trapnell, C., Pimentel, H., Kelley, R. and Salzberg, S. L.** (2013). TopHat2: accurate  
733 alignment of transcriptomes in the presence of insertions, deletions and gene fusions.  
734 *Genome Biol* **14**, R36.
- 735 **Krjutskov, K., Katayama, S., Saare, M., Vera-Rodriguez, M., Lubenets, D., Samuel, K., Laisk-Podar,  
736 T., Teder, H., Einarsdottir, E., Salumets, A., et al.** (2016). Single-cell transcriptome analysis of  
737 endometrial tissue. *Hum Reprod* **31**, 844-853.
- 738 **Labuda, D., Sinnott, D., Richer, C., Deragon, J. M. and Striker, G.** (1991). Evolution of mouse B1  
739 repeats: 7SL RNA folding pattern conserved. *J Mol Evol* **32**, 405-414.
- 740 **Ludwig, A., Rozhdestvensky, T. S., Kuryshev, V. Y., Schmitz, J. and Brosius, J.** (2005). An unusual  
741 primate locus that attracted two independent Alu insertions and facilitates their  
742 transcription. *J Mol Biol* **350**, 200-214.
- 743 **Madisson, E., Jouhilahti, E. M., Vesterlund, L., Tohonen, V., Krjutskov, K., Petropoulos, S.,  
744 Einarsdottir, E., Linnarsson, S., Lanner, F., Mansson, R., et al.** (2016). Characterization and  
745 target genes of nine human PRD-like homeobox domain genes expressed exclusively in early  
746 embryos. *Sci Rep* **6**, 28995.
- 747 **Meng, X., Brodsky, M. H. and Wolfe, S. A.** (2005). A bacterial one-hybrid system for determining the  
748 DNA-binding specificity of transcription factors. *Nat Biotechnol* **23**, 988-994.
- 749 **Mouse Genome Sequencing, C., Waterston, R. H., Lindblad-Toh, K., Birney, E., Rogers, J., Abril, J. F.,  
750 Agarwal, P., Agarwala, R., Ainscough, R., Alexandersson, M., et al.** (2002). Initial sequencing  
751 and comparative analysis of the mouse genome. *Nature* **420**, 520-562.
- 752 **Niakan, K. K., Han, J., Pedersen, R. A., Simon, C. and Pera, R. A.** (2012). Human pre-implantation  
753 embryo development. *Development* **139**, 829-841.
- 754 **Pelletier, J., Thomas, G. and Volarevic, S.** (2018). Ribosome biogenesis in cancer: new players and  
755 therapeutic avenues. *Nat Rev Cancer* **18**, 51-63.
- 756 **Petropoulos, S., Edsgard, D., Reinius, B., Deng, Q., Panula, S. P., Codeluppi, S., Plaza Reyes, A.,  
757 Linnarsson, S., Sandberg, R. and Lanner, F.** (2016). Single-Cell RNA-Seq Reveals Lineage and X  
758 Chromosome Dynamics in Human Preimplantation Embryos. *Cell* **165**, 1012-1026.
- 759 **Polak, P. and Domany, E.** (2006). Alu elements contain many binding sites for transcription factors  
760 and may play a role in regulation of developmental processes. *BMC Genomics* **7**, 133.
- 761 **R Development Core Team** (2010). R: A language and environment for statistical computing. Vienna,  
762 Austria: R Foundation for Statistical Computing.
- 763 **Ritchie, M. E., Phipson, B., Wu, D., Hu, Y., Law, C. W., Shi, W. and Smyth, G. K.** (2015). limma powers  
764 differential expression analyses for RNA-sequencing and microarray studies. *Nucleic Acids  
765 Res* **43**, e47.
- 766 **Robinson, M. D., McCarthy, D. J. and Smyth, G. K.** (2010). edgeR: a Bioconductor package for  
767 differential expression analysis of digital gene expression data. *Bioinformatics* **26**, 139-140.
- 768 **Rubin, C. J., Megens, H. J., Martinez Barrio, A., Maqbool, K., Sayyab, S., Schwochow, D., Wang, C.,  
769 Carlborg, O., Jern, P., Jorgensen, C. B., et al.** (2012). Strong signatures of selection in the  
770 domestic pig genome. *Proc Natl Acad Sci U S A* **109**, 19529-19536.
- 771 **Sandelin, A., Alkema, W., Engstrom, P., Wasserman, W. W. and Lenhard, B.** (2004). JASPAR: an  
772 open-access database for eukaryotic transcription factor binding profiles. *Nucleic Acids Res*  
773 **32**, D91-94.
- 774 **Su, M., Han, D., Boyd-Kirkup, J., Yu, X. and Han, J. D.** (2014). Evolution of Alu elements toward  
775 enhancers. *Cell Rep* **7**, 376-385.
- 776 **Tohonen, V., Katayama, S., Vesterlund, L., Jouhilahti, E. M., Sheikhi, M., Madisson, E., Filippini-  
777 Cattaneo, G., Jaconi, M., Johnsson, A., Burglin, T. R., et al.** (2015). Novel PRD-like  
778 homeodomain transcription factors and retrotransposon elements in early human  
779 development. *Nat Commun* **6**, 8207.

- 780 **Tong, Z. B., Gold, L., Pfeifer, K. E., Dorward, H., Lee, E., Bondy, C. A., Dean, J. and Nelson, L. M.**  
781 (2000). Mater, a maternal effect gene required for early embryonic development in mice.  
782 *Nat Genet* **26**, 267-268.
- 783 **Trapnell, C., Cacchiarelli, D., Grimsby, J., Pokharel, P., Li, S., Morse, M., Lennon, N. J., Livak, K. J.,**  
784 **Mikkelsen, T. S. and Rinn, J. L.** (2014). The dynamics and regulators of cell fate decisions are  
785 revealed by pseudotemporal ordering of single cells. *Nat Biotechnol* **32**, 381-386.
- 786 **Tsirigos, A. and Rigoutsos, I.** (2009). Alu and b1 repeats have been selectively retained in the  
787 upstream and intronic regions of genes of specific functional classes. *PLoS Comput Biol* **5**,  
788 e1000610.
- 789 **Ullu, E. and Tschudi, C.** (1984). Alu sequences are processed 7SL RNA genes. *Nature* **312**, 171-172.
- 790 **Utsunomiya, Y. T., do Carmo, A. S., Carneiro, R., Neves, H. H., Matos, M. C., Zavarez, L. B., Perez**  
791 **O'Brien, A. M., Solkner, J., McEwan, J. C., Cole, J. B., et al.** (2013). Genome-wide association  
792 study for birth weight in Nellore cattle points to previously described orthologous genes  
793 affecting human and bovine height. *BMC Genet* **14**, 52.
- 794 **Van Dyck, F., Braem, C. V., Chen, Z., Declercq, J., Deckers, R., Kim, B. M., Ito, S., Wu, M. K., Cohen,**  
795 **D. E., Dewerchin, M., et al.** (2007). Loss of the PlagL2 transcription factor affects lacteal  
796 uptake of chylomicrons. *Cell Metab* **6**, 406-413.
- 797 **Wang, H. and Dey, S. K.** (2006). Roadmap to embryo implantation: clues from mouse models. *Nat*  
798 *Rev Genet* **7**, 185-199.
- 799 **Vassena, R., Boue, S., Gonzalez-Roca, E., Aran, B., Auer, H., Veiga, A. and Izpisua Belmonte, J. C.**  
800 (2011). Waves of early transcriptional activation and pluripotency program initiation during  
801 human preimplantation development. *Development* **138**, 3699-3709.
- 802 **Vogt, E. J., Meglicki, M., Hartung, K. I., Borsuk, E. and Behr, R.** (2012). Importance of the  
803 pluripotency factor LIN28 in the mammalian nucleolus during early embryonic development.  
804 *Development* **139**, 4514-4523.
- 805 **Wong, C. C., Loewke, K. E., Bossert, N. L., Behr, B., De Jonge, C. J., Baer, T. M. and Reijo Pera, R. A.**  
806 (2010). Non-invasive imaging of human embryos before embryonic genome activation  
807 predicts development to the blastocyst stage. *Nat Biotechnol* **28**, 1115-1121.
- 808 **Voz, M. L., Agten, N. S., Van de Ven, W. J. and Kas, K.** (2000). PLAG1, the main translocation target in  
809 pleomorphic adenoma of the salivary glands, is a positive regulator of IGF-II. *Cancer Res* **60**,  
810 106-113.
- 811 **Xue, Z., Huang, K., Cai, C., Cai, L., Jiang, C. Y., Feng, Y., Liu, Z., Zeng, Q., Cheng, L., Sun, Y. E., et al.**  
812 (2013). Genetic programs in human and mouse early embryos revealed by single-cell RNA  
813 sequencing. *Nature* **500**, 593-597.
- 814 **Yan, L., Yang, M., Guo, H., Yang, L., Wu, J., Li, R., Liu, P., Lian, Y., Zheng, X., Yan, J., et al.** (2013).  
815 Single-cell RNA-Seq profiling of human preimplantation embryos and embryonic stem cells.  
816 *Nat Struct Mol Biol* **20**, 1131-1139.
- 817 **Yu, G., Li, F., Qin, Y., Bo, X., Wu, Y. and Wang, S.** (2010). GOSemSim: an R package for measuring  
818 semantic similarity among GO terms and gene products. *Bioinformatics* **26**, 976-978.
- 819 **Zhang, W., Li, J., Guo, Y., Zhang, L., Xu, L., Gao, X., Zhu, B., Gao, H., Ni, H. and Chen, Y.** (2016). Multi-  
820 strategy genome-wide association studies identify the DCAF16-NCAPG region as a  
821 susceptibility locus for average daily gain in cattle. *Sci Rep* **6**, 38073.

822



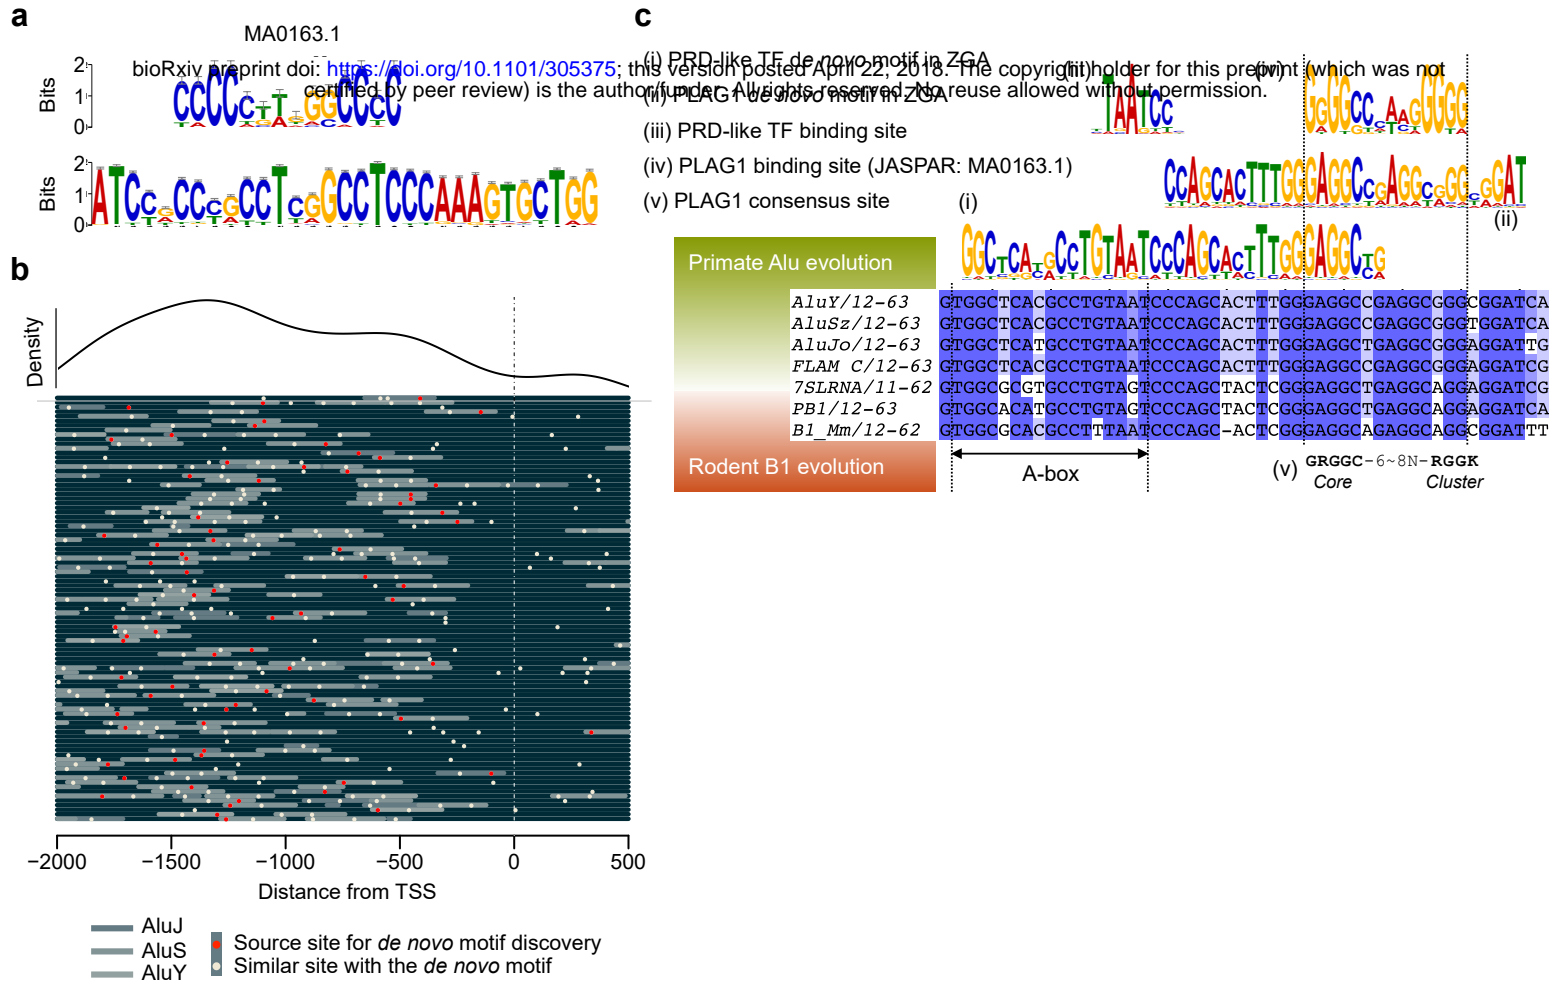

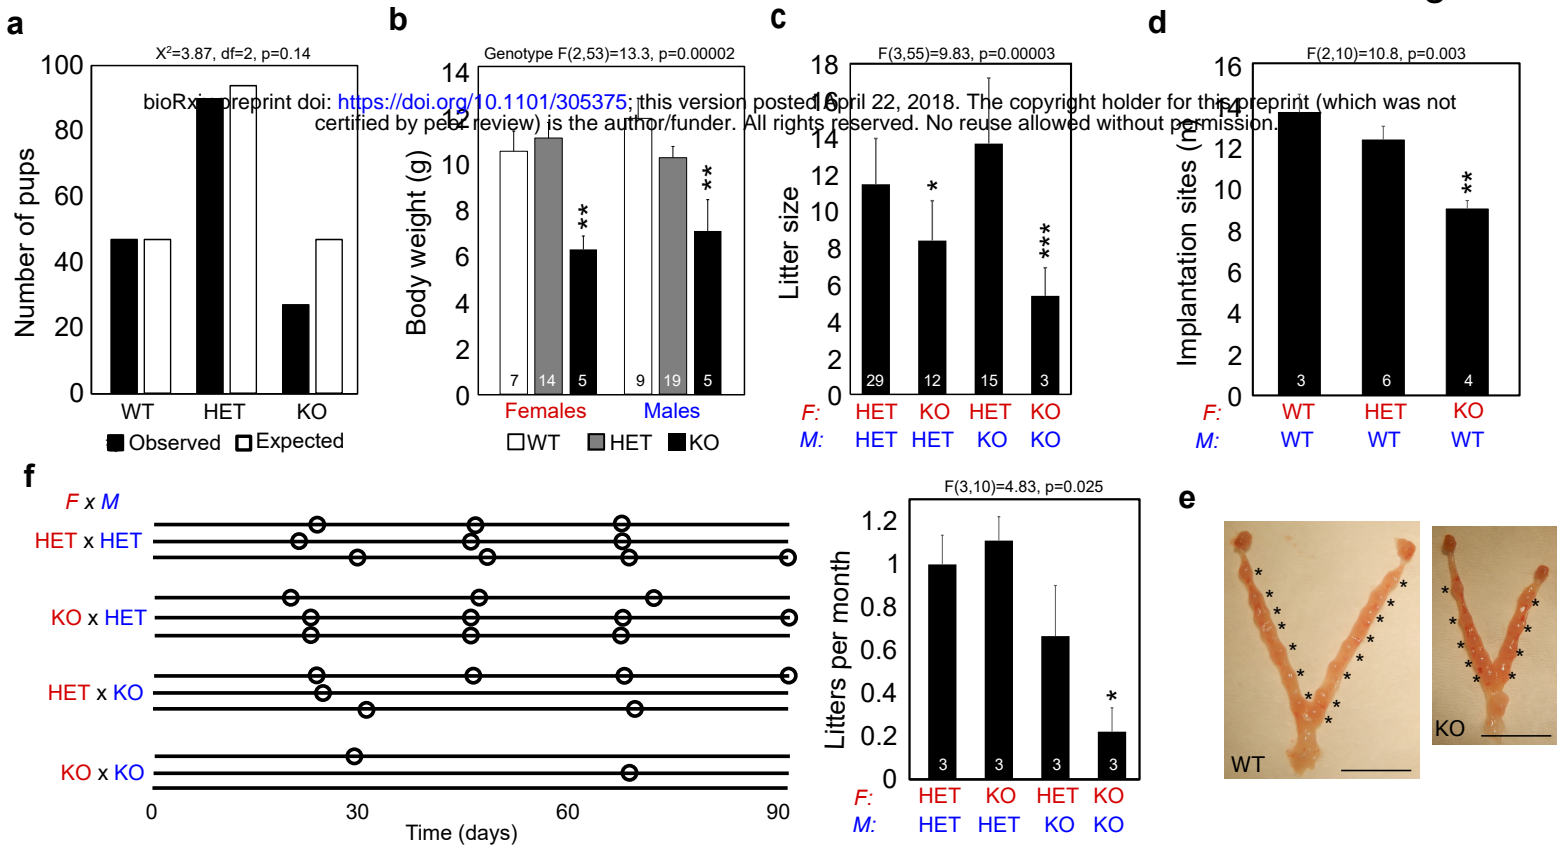

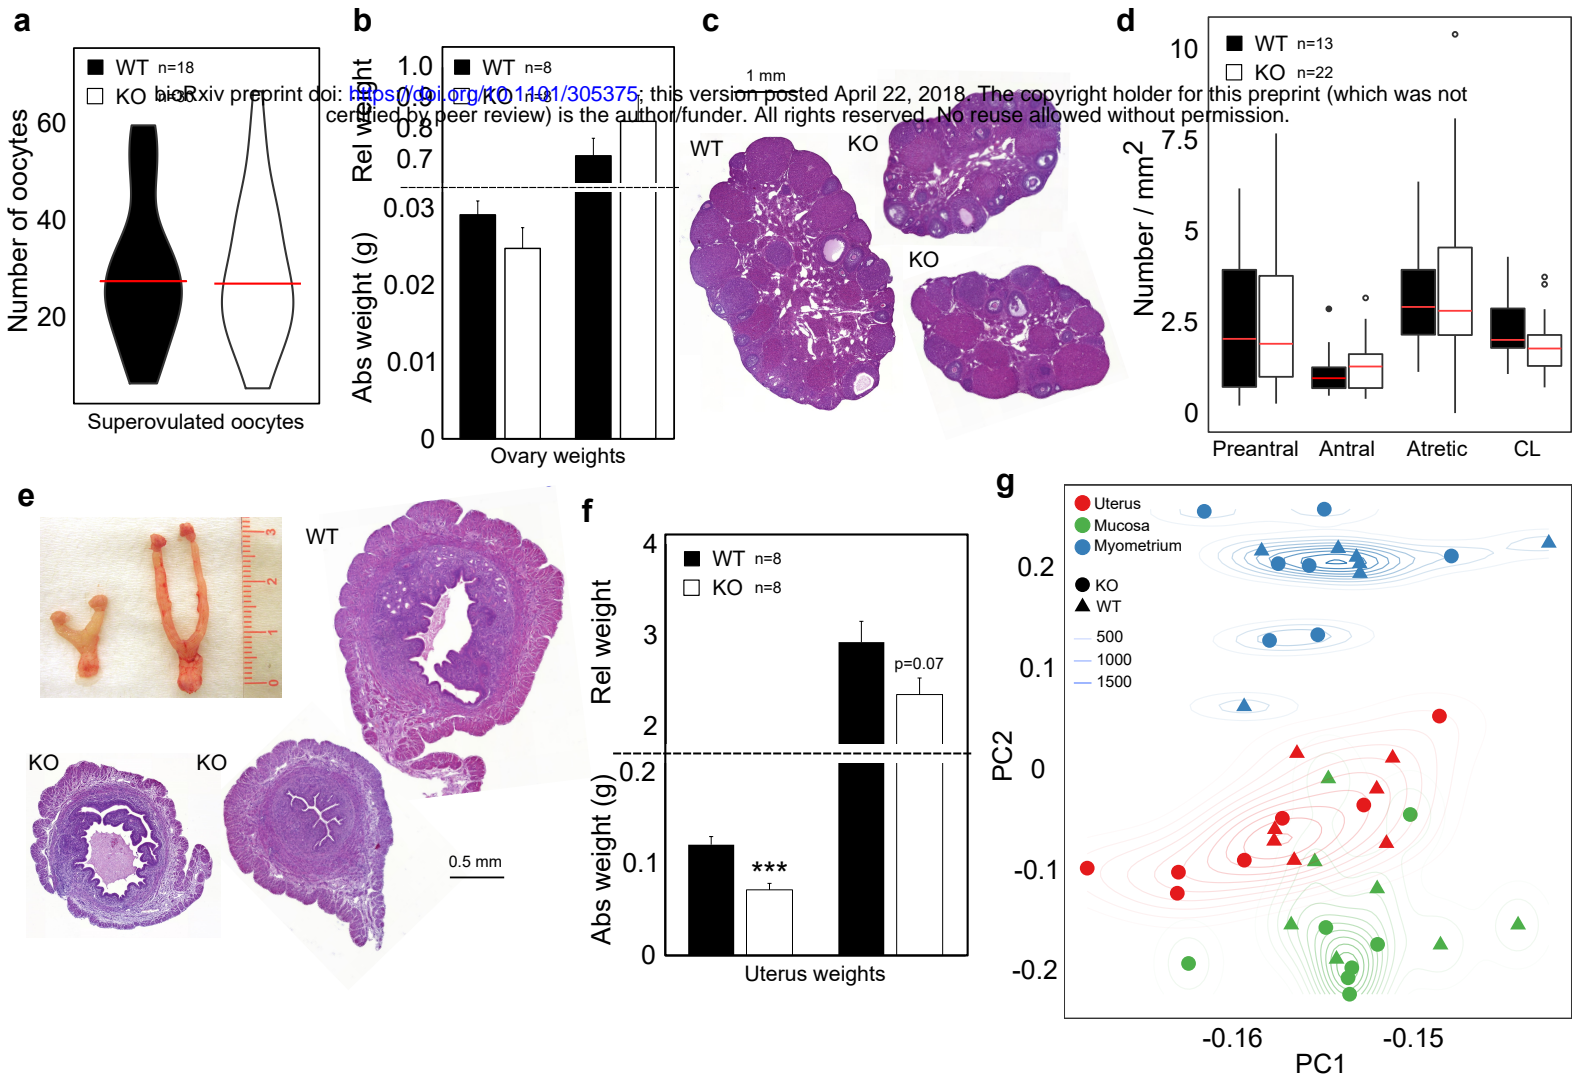

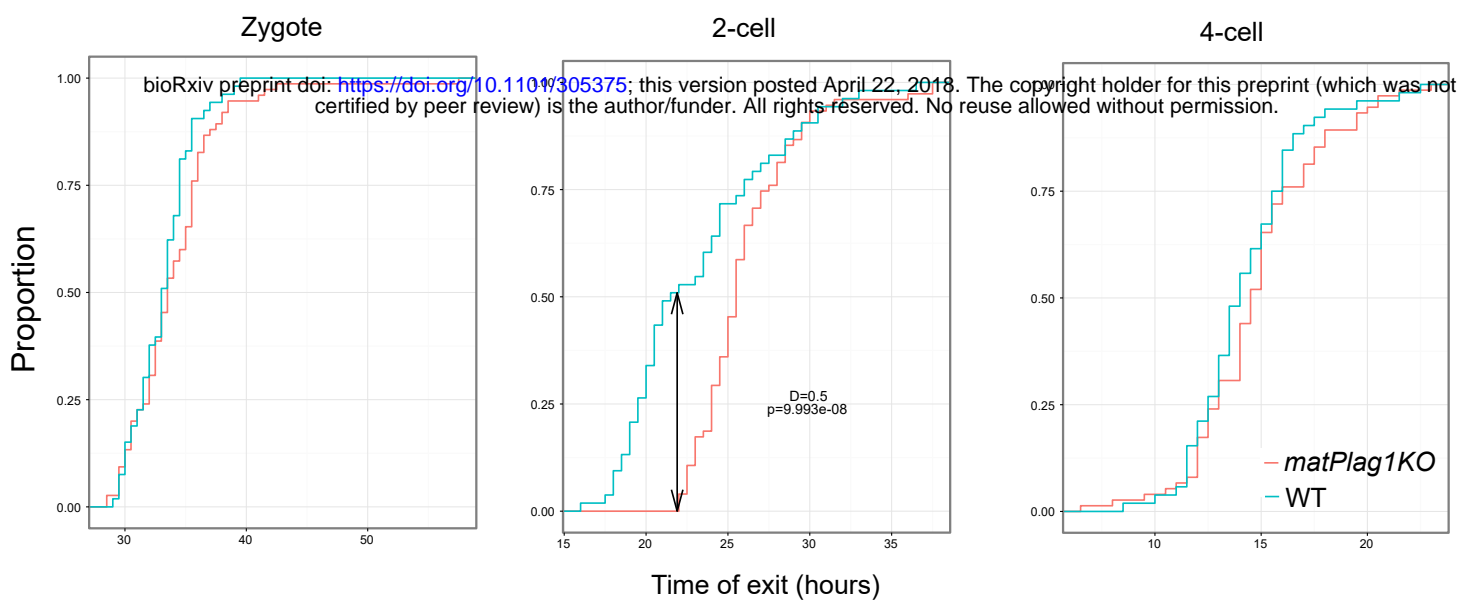

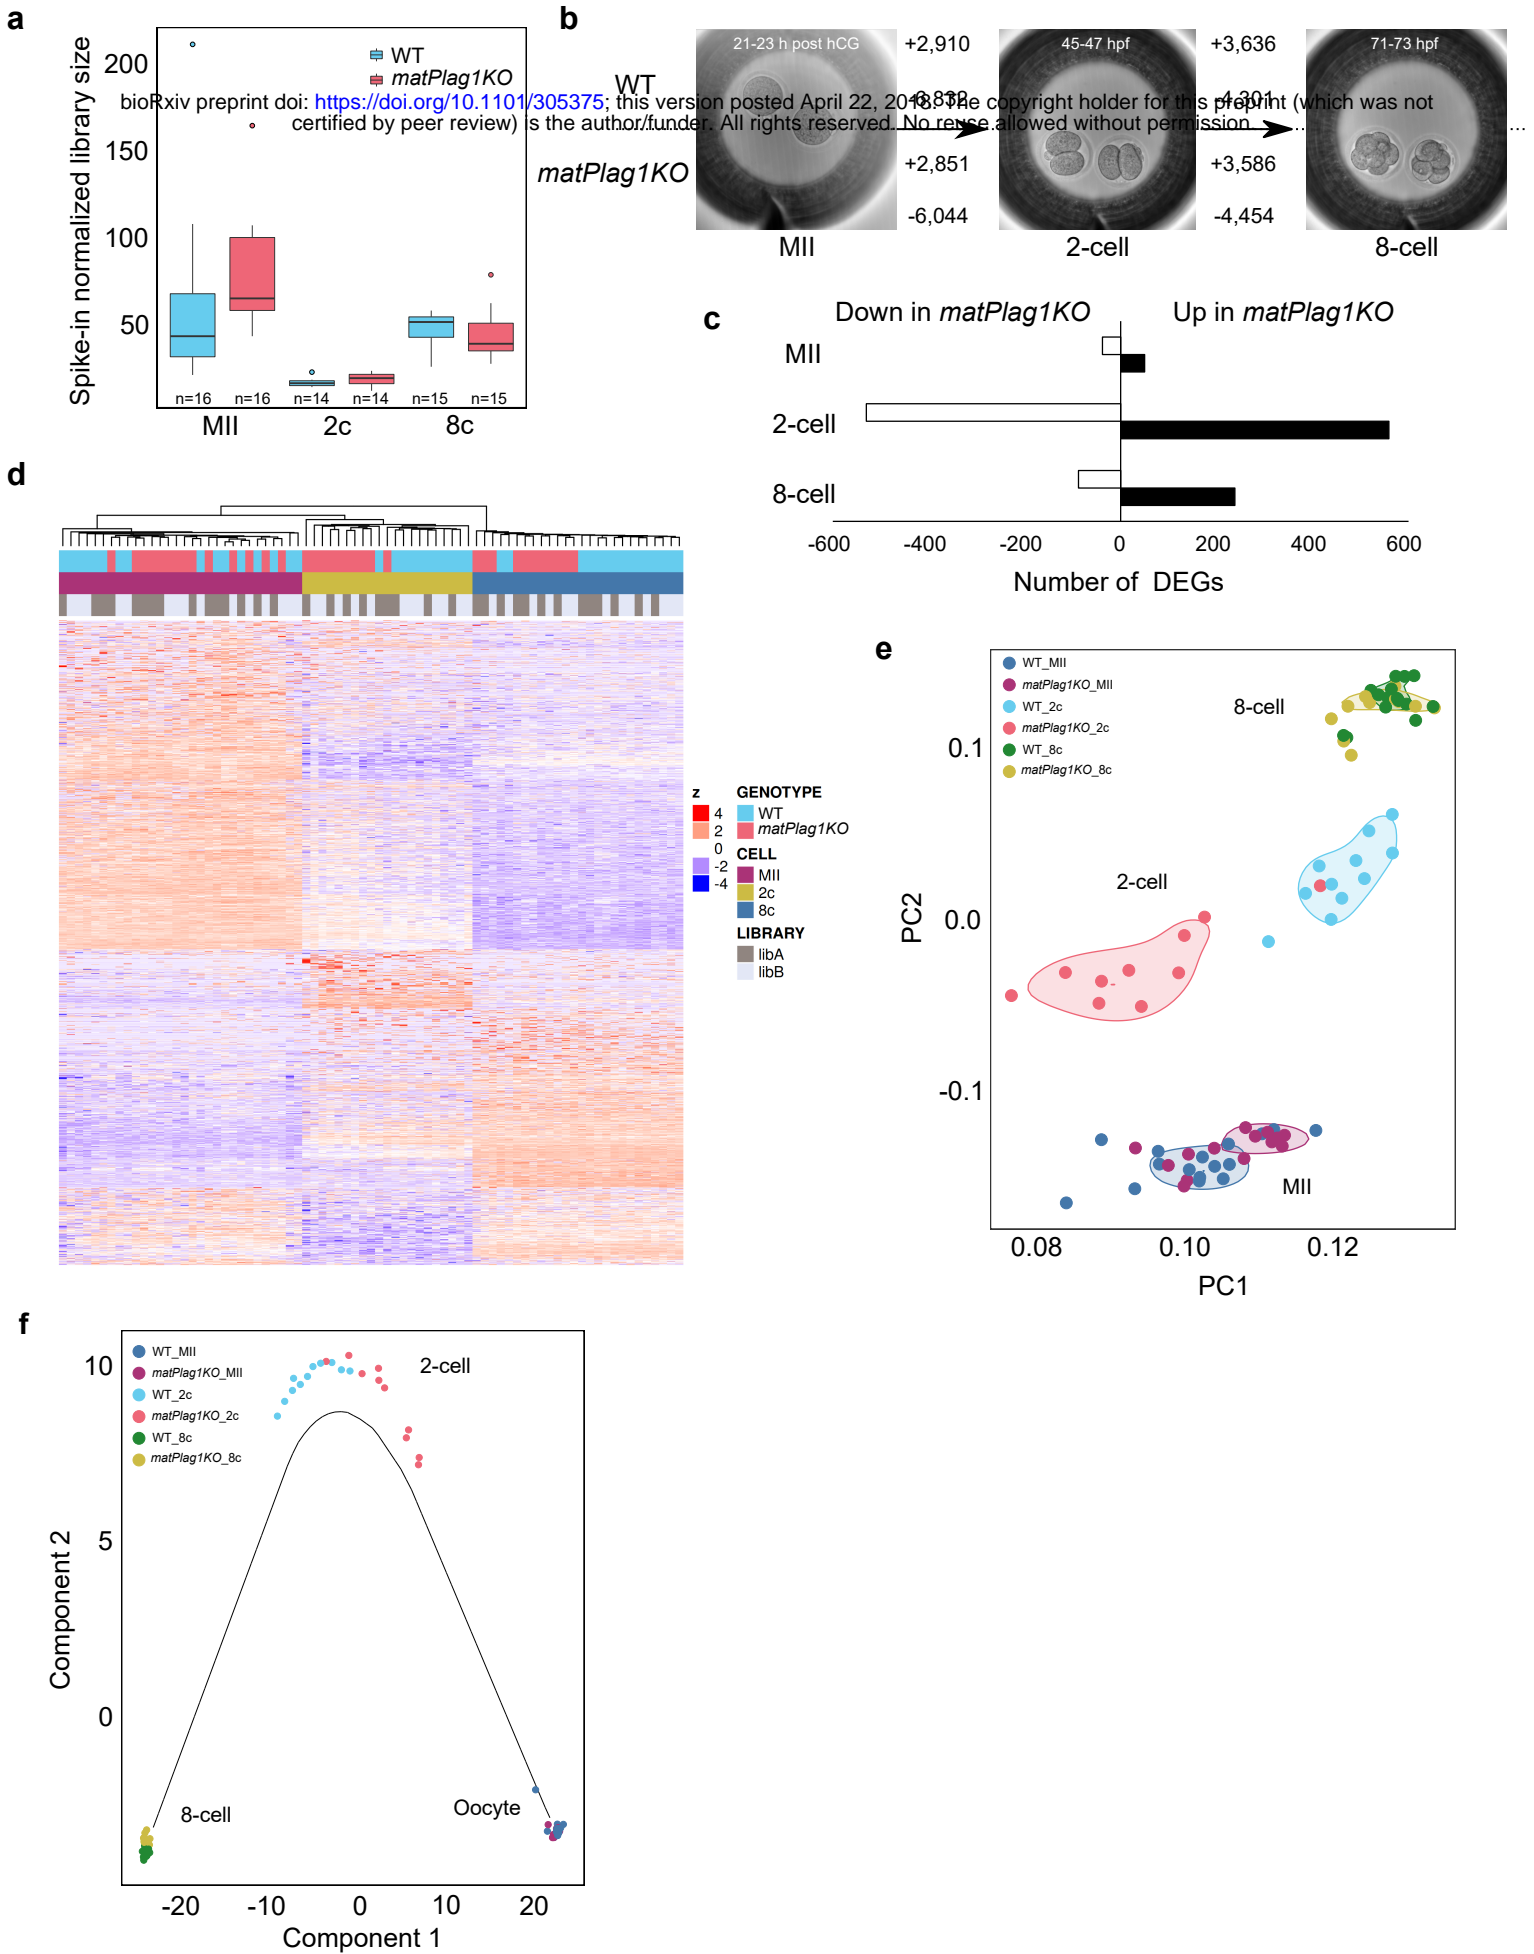

bioRxiv preprint doi: <https://doi.org/10.1101/305375>; this version posted April 22, 2018. The copyright holder for this preprint (which was not certified by peer review) is the author/funder. All rights reserved. No reuse allowed without permission.

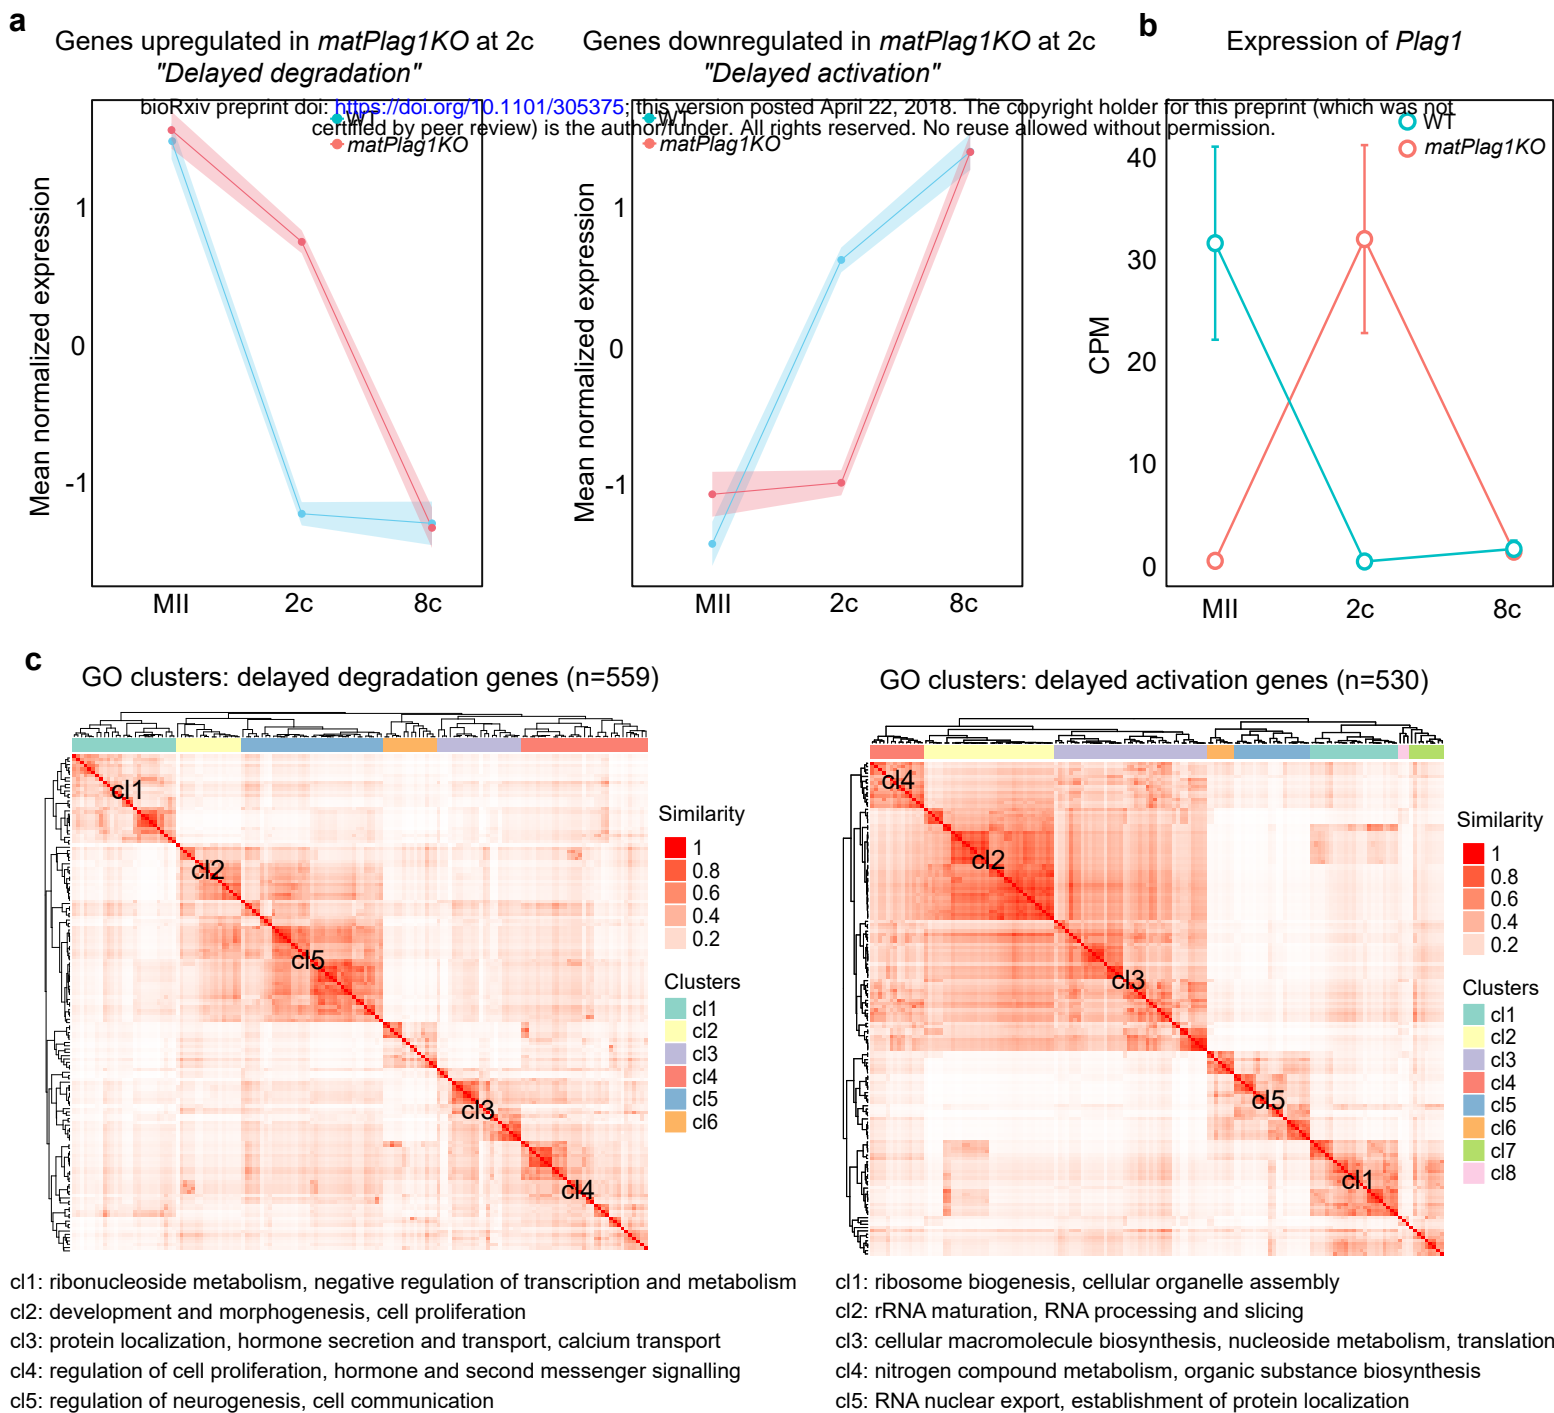

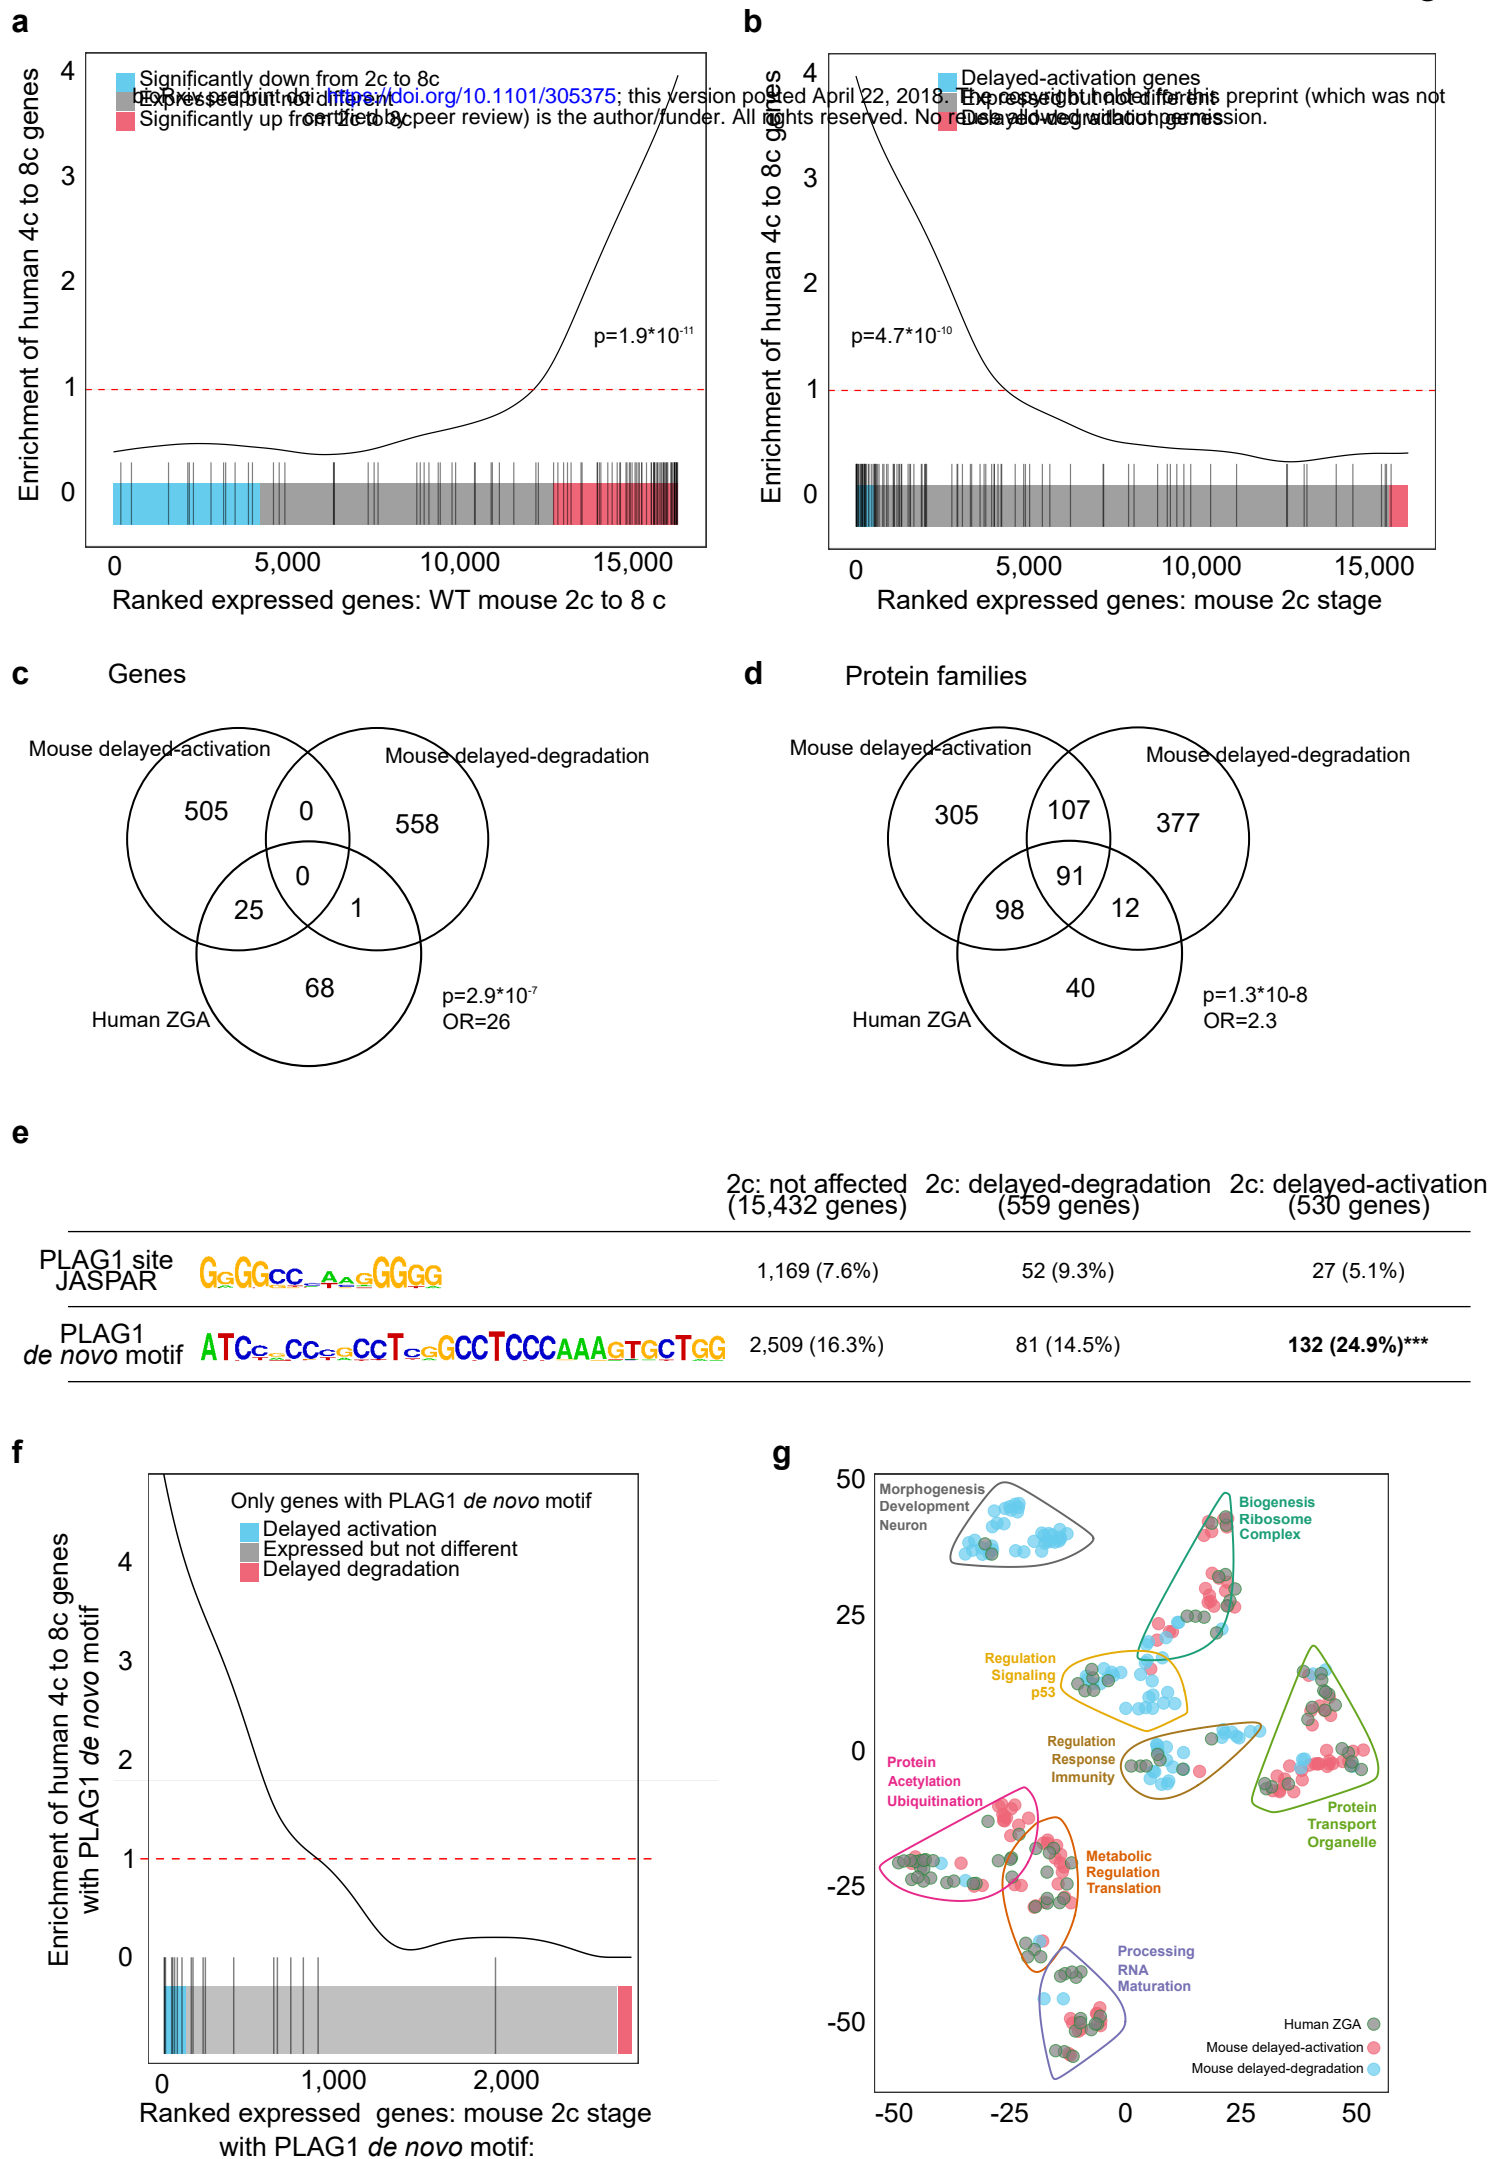

Source: http://biorxiv.org/content/10.1101/305375v1.full.pdf
